# Supplementary material for: Altered Moesin and Actin Cytoskeleton Protein Rearrangements Affect Transendothelial Permeability in Human Endothelial Cells upon Dengue Virus Infection and TNF-α Treatment
Source: MDPI journal article supplement (doi:10.3390/v13102042), 2021-10-11
Supplement: s1 [file s1]

Supplement 1

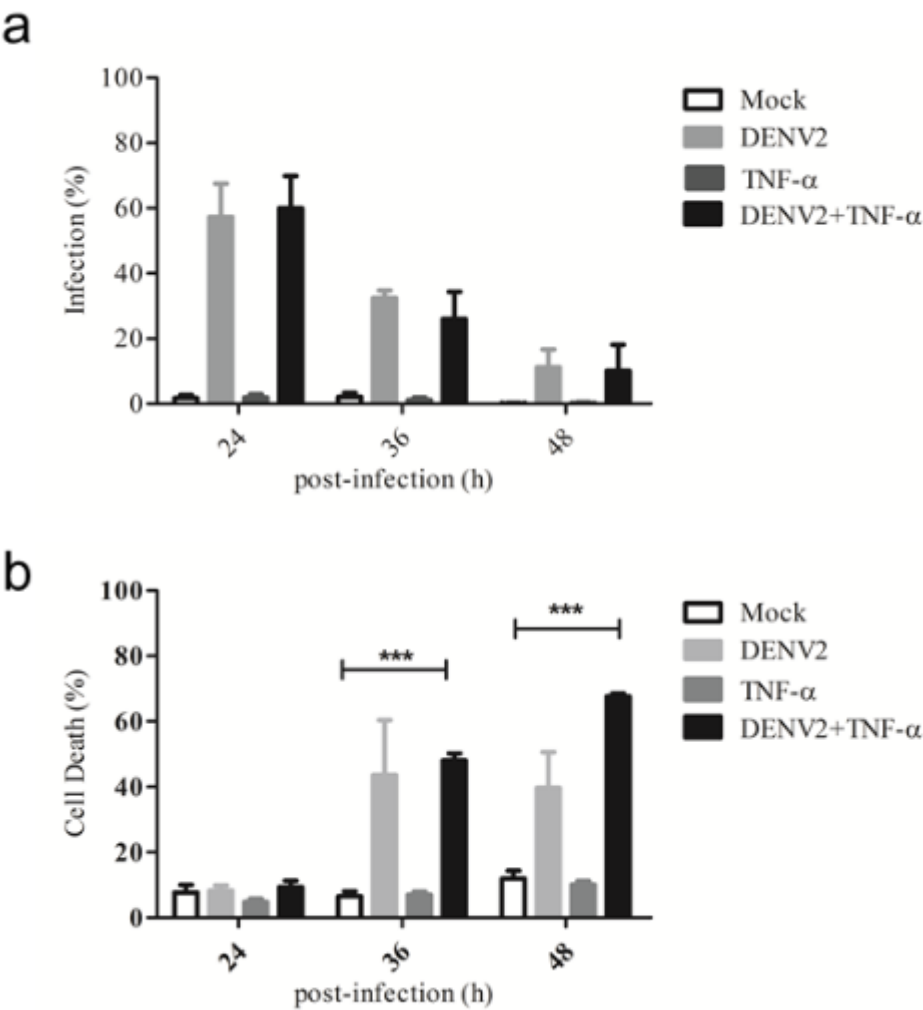

Supplement 2

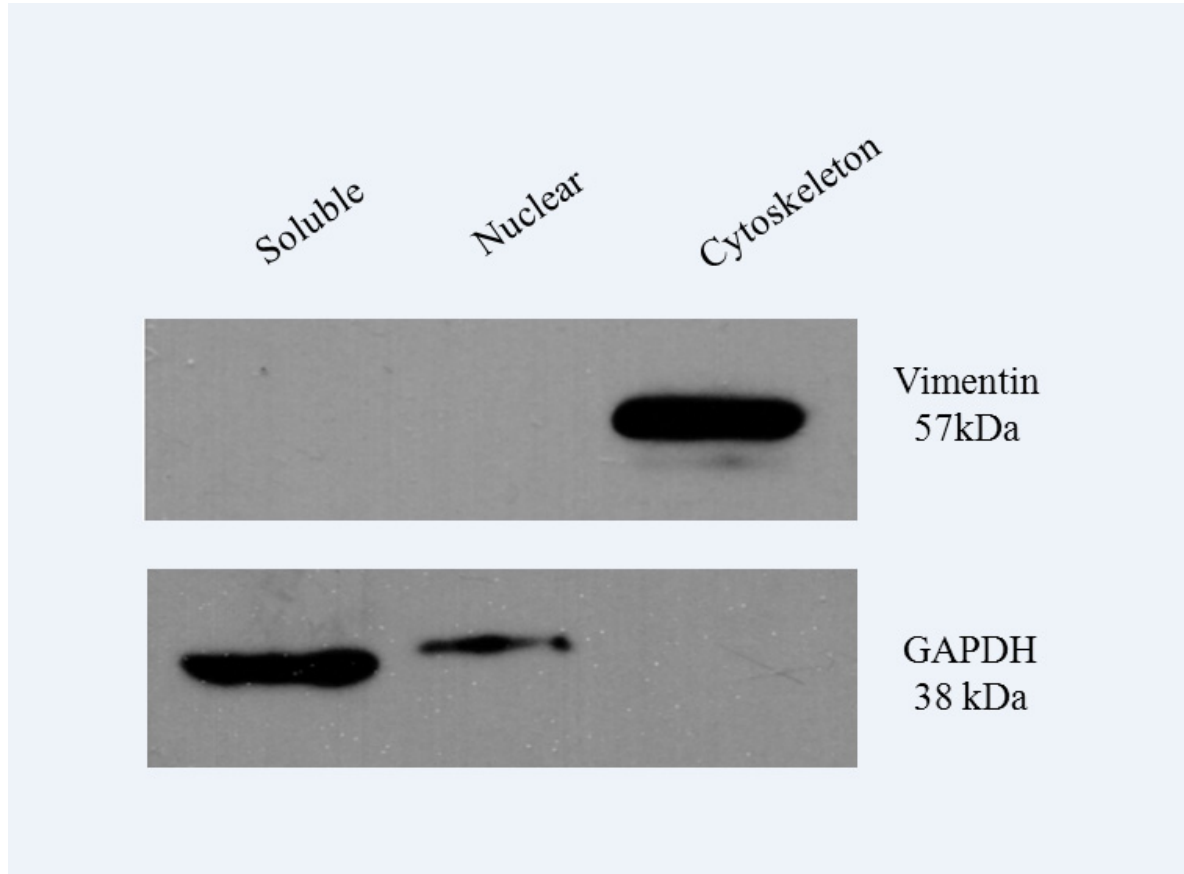

**Supplement 3.** Altered cytoskeleton proteins in EA.hy926 cells during DENV2 infection and TNF- $\alpha$  treatment.

| No. | NCBI ID      | Protein                                                                                            | pI    | MW (kDa) | Identification score | No. of matched peptides | %cov | Mock (Mean $\pm$ SD) | Treated (Mean $\pm$ SD) | Ratio (Treated/Mock) |
|-----|--------------|----------------------------------------------------------------------------------------------------|-------|----------|----------------------|-------------------------|------|----------------------|-------------------------|----------------------|
| 1   | gi 296164    | 156 kDa Protein                                                                                    | 5.52  | 156      | 73                   | 2                       | 6    | 0 $\pm$ 0            | no emPAI                | n/a                  |
| 2   | gi 4506707   | 40S ribosomal protein S25                                                                          | 10.12 | 13.73    | 73                   | 3                       | 8    | 0.25 $\pm$ 0         | 0 $\pm$ 0               | n/a                  |
| 3   | gi 407308    | 54 kDa protein                                                                                     | 8.66  | 54.22    | 71                   | 2                       | 8.9  | 0.03 $\pm$ 0.03      | no emPAI                | n/a                  |
| 4   | gi 31542947  | 60 kDa heat shock protein, mitochondrial                                                           | 5.7   | 61.02    | 1001                 | 17                      | 45.9 | 0.96 $\pm$ 0.69      | 0.72 $\pm$ 0.68         | 0.75                 |
| 5   | gi 4506631   | 60S ribosomal protein L30                                                                          | 9.65  | 12.78    | 95                   | 2                       | 36.5 | 0.44 $\pm$ 0.17      | 0 $\pm$ 0               | 0.00                 |
| 6   | gi 306891    | 90kDa heat shock protein                                                                           | 4.97  | 83.24    | 254                  | 8                       | 9.3  | 0.11 $\pm$ 0.08      | 0.06 $\pm$ 0.06         | 0.53                 |
| 7   | gi 4501881   | actin, alpha skeletal muscle                                                                       | 5.23  | 42.02    | 705                  | 15                      | 41.4 | 1.84 $\pm$ 0.38      | no emPAI                | n/a                  |
| 8   | gi 4501887   | actin, cytoplasmic 2                                                                               | 5.31  | 41.77    | 1170                 | 17                      | 61.6 | 4.02 $\pm$ 0.78      | 2.65 $\pm$ 1.10         | 0.66                 |
| 9   | gi 212293358 | actinin alpha 1 isoform 3                                                                          | 5.38  | 107.1    | 157                  | 4                       | 5.1  | 0 $\pm$ 0            | 0.03 $\pm$ 0.02         | n/a                  |
| 10  | gi 62421162  | actin-like protein                                                                                 | 6.19  | 11.53    | 86                   | 3                       | 28.2 | 0.3 $\pm$ 0          | 0.03 $\pm$ 0.02         | 0.08                 |
| 11  | gi 62420965  | actin-like protein                                                                                 | 6.04  | 11.51    | 92                   | 3                       | 19.4 | 0.3 $\pm$ 0          | 0.13 $\pm$ 0.12         | 0.42                 |
| 12  | gi 62421170  | actin-like protein                                                                                 | 6.06  | 11.55    | 115                  | 3                       | 24.3 | 0.94 $\pm$ 0.25      | 0.51 $\pm$ 0.19         | 0.54                 |
| 13  | gi 62421077  | actin-like protein                                                                                 | 6.19  | 11.6     | 62                   | 2                       | 10.7 | 0.3 $\pm$ 0          | 0.25 $\pm$ 0.24         | 0.83                 |
| 14  | gi 339920    | ADP/ADT translocator protein                                                                       | 9.84  | 33.13    | 257                  | 8                       | 30   | 0.47 $\pm$ 0         | 0.39 $\pm$ 0.37         | 0.83                 |
| 15  | gi 179247    | ADP/ATP carrier protein                                                                            | 9.71  | 32.96    | 308                  | 9                       | 36.6 | 0.67 $\pm$ 0         | 0.27 $\pm$ 0.25         | 0.39                 |
| 16  | gi 46852164  | alpha-mannosidase 2C1 isoform 1                                                                    | 6.1   | 115.8    | 65                   | 2                       | 7.7  | no emPAI             | 0.04 $\pm$ 0.04         | n/a                  |
| 17  | gi 444738085 | alternative protein APLP2                                                                          | 12.06 | 18.99    | 61                   | 2                       | 19.9 | no emPAI             | 0 $\pm$ 0               | n/a                  |
| 18  | gi 444738203 | alternative protein HRC                                                                            | 11.99 | 34.32    | 60                   | 2                       | 35.1 | no emPAI             | 0.46 $\pm$ 0.46         | n/a                  |
| 19  | gi 119590685 | amyotrophic lateral sclerosis 2 (juvenile) chromosome region, candidate 11, isoform CRA_c, partial | 7.34  | 208.9    | 61                   | 2                       | 3.2  | 0 $\pm$ 0            | 0.83 $\pm$ 0.42         | n/a                  |
| 20  | gi 34391502  | anion exchanger SLC4A3                                                                             | 6.01  | 138.6    | 79                   | 3                       | 5.7  | no emPAI             | 0 $\pm$ 0               | n/a                  |
| 21  | gi 119626693 | ankyrin 2, neuronal, isoform CRA_b                                                                 | 5.02  | 431.1    | 108                  | 3                       | 3.3  | no emPAI             | 0.01 $\pm$ 0.01         | n/a                  |
| 22  | gi 739514    | ankyrin B:ISOTYPE=440kD                                                                            | 5.03  | 430.1    | 86                   | 2                       | 1.9  | 0 $\pm$ 0            | no emPAI                | n/a                  |
| 23  | gi 608025    | ankyrin G                                                                                          | 6.12  | 480.1    | 68                   | 2                       | 1.2  | no emPAI             | 0 $\pm$ 0               | n/a                  |

| No. | NCBI ID      | Protein                                                                                                   | pI   | MW (kDa) | Identification score | No. of matched peptides | %cov | Mock (Mean±SD) | Treated (Mean±SD) | Ratio (Treated/Mock) |
|-----|--------------|-----------------------------------------------------------------------------------------------------------|------|----------|----------------------|-------------------------|------|----------------|-------------------|----------------------|
| 24  | gi 16306978  | Annexin A2                                                                                                | 7.57 | 38.59    | 1243                 | 17                      | 74.9 | 6.21±0.48      | no emPAI          | n/a                  |
| 25  | gi 18645167  | Annexin A2                                                                                                | 7.57 | 38.55    | 1237                 | 17                      | 78.5 | 6.25±0.49      | no emPAI          | n/a                  |
| 26  | gi 119597993 | annexin A2, isoform CRA_c                                                                                 | 5.93 | 32.43    | 1132                 | 17                      | 82.2 | 3.38±3.38      | 0±0               | 0.00                 |
| 27  | gi 415819    | antigen of the monoclonal antibody Ki-67                                                                  | 9.45 | 358.5    | 111                  | 3                       | 4.1  | no emPAI       | 0±0               | n/a                  |
| 28  | gi 182397    | APC                                                                                                       | 7.84 | 311.5    | 69                   | 2                       | 3.5  | no emPAI       | 0.03±0.03         | n/a                  |
| 29  | gi 16118245  | ARAP2                                                                                                     | 7.01 | 193.3    | 66                   | 2                       | 2.8  | no emPAI       | 0±0               | n/a                  |
| 30  | gi 56417899  | ARF-binding protein 1                                                                                     | 5.1  | 481.6    | 66                   | 2                       | 2    | no emPAI       | 0±0               | n/a                  |
| 31  | gi 4502247   | armadillo repeat protein deleted in velo-cardio-facial syndrome                                           | 6.38 | 104.6    | 99                   | 3                       | 8.5  | no emPAI       | 0±0               | v                    |
| 32  | gi 5453559   | ATP synthase subunit d, mitochondrial isoform a                                                           | 5.21 | 18.48    | 64                   | 2                       | 26.1 | 0.18±0         | 0±0               | 0.00                 |
| 33  | gi 4502303   | ATP synthase subunit O, mitochondrial precursor                                                           | 9.97 | 23.26    | 198                  | 5                       | 29.1 | 0.79±0.12      | no emPAI          | n/a                  |
| 34  | gi 16877071  | ATP synthase, H <sup>+</sup> transporting, mitochondrial F1 complex, gamma polypeptide 1                  | 9.23 | 32.95    | 124                  | 4                       | 8.4  | 0.33±0         | 0±0               | 0.00                 |
| 35  | gi 119630463 | ATP-binding cassette, sub-family C (CFTR/MRP), member 13, isoform CRA_a                                   | 9.13 | 107.1    | 65                   | 2                       | 4.5  | no emPAI       | 0.24±0.24         | n/a                  |
| 36  | gi 28935     | ATP-citrate (pro-S)-lyase                                                                                 | 6.42 | 121.3    | 69                   | 2                       | 4    | no emPAI       | 0.08±0.08         | n/a                  |
| 37  | gi 100913206 | ATP-dependent RNA helicase A                                                                              | 6.41 | 140.9    | 133                  | 3                       | 9.8  | 0.02±0         | 0.03±0.02         | 1.25                 |
| 38  | gi 825671    | B23 nucleophosmin (280 AA)                                                                                | 4.71 | 30.92    | 340                  | 9                       | 26.1 | 1.06±0.31      | 0.42±0.23         | 0.39                 |
| 39  | gi 86947     | beta-galactoside-binding lectin, placental - human (fragments)                                            | 4.63 | 11.99    | 112                  | 3                       | 32.7 | 0.29±0         | 0±0               | 0.00                 |
| 40  | gi 12053672  | beta-myosin heavy chain                                                                                   | 5.63 | 223      | 72                   | 2                       | 6.1  | 0±0            | 0.11±0.06         | n/a                  |
| 41  | gi 4507339   | brachyury protein isoform 1                                                                               | 6.62 | 47.41    | 61                   | 2                       | 6.2  | 0.04±0.04      | 0.09±0.09         | 2.57                 |
| 42  | gi 6683494   | bromodomain adjacent to zinc finger domain 1A                                                             | 7.76 | 190.7    | 82                   | 3                       | 4.1  | 0.02±0         | 0.04±0.03         | 1.75                 |
| 43  | gi 306875    | C protein                                                                                                 | 5.1  | 31.95    | 218                  | 6                       | 20   | 0.43±0.30      | 0.21±0.14         | 0.48                 |
| No. | NCBI ID      | Protein                                                                                                   | pI   | MW (kDa) | Identification score | No. of matched peptides | %cov | Mock (Mean±SD) | Treated (Mean±SD) | Ratio (Treated/Mock) |
| 44  | gi 119603980 | Ca <sup>2+</sup> -dependent activator protein for secretion 2, isoform CRA_d                              | 5.8  | 147.8    | 69                   | 2                       | 6.8  | no emPAI       | 0.85±0.85         | n/a                  |
| 45  | gi 189571674 | cadherin-23 isoform 1 precursor                                                                           | 4.5  | 369.3    | 60                   | 2                       | 1.6  | no emPAI       | 0.06±0.06         | n/a                  |
| 46  | gi 119585699 | calcium channel, voltage-dependent, L type, alpha 1D subunit, isoform CRA_j                               | 6.96 | 242.9    | 74                   | 3                       | 3.9  | 0±0            | no emPAI          | n/a                  |
| 47  | gi 21541504  | calcium-dependent activator protein for secretion protein                                                 | 5.53 | 144      | 86                   | 3                       | 6.4  | no emPAI       | 0±0               | n/a                  |
| 48  | gi 10716563  | calnexin precursor                                                                                        | 4.47 | 67.53    | 94                   | 3                       | 10.1 | 0±0            | no emPAI          | n/a                  |
| 49  | gi 180631    | calnexin, partial                                                                                         | 4.22 | 40.81    | 76                   | 2                       | 11.2 | 0.08±0         | 0.01±0.01         | 0.13                 |
| 50  | gi 17298317  | candidate tumor suppressor protein, partial                                                               | 4.78 | 172.4    | 64                   | 2                       | 5.7  | 0±0            | 0.02±0.01         | n/a                  |
| 51  | gi 219524    | cardiac alpha-myosin heavy chain                                                                          | 5.63 | 223.4    | 114                  | 3                       | 4.5  | 0.01±0         | no emPAI          | n/a                  |
| 52  | gi 29727     | cardiac beta myosin heavy chain                                                                           | 5.62 | 222.8    | 79                   | 3                       | 5.9  | 0±0            | no emPAI          | n/a                  |
| 53  | gi 951338    | CAS                                                                                                       | 5.51 | 110.2    | 65                   | 2                       | 4    | 0.03±0         | no emPAI          | n/a                  |
| 54  | gi 10835165  | CD59 glycoprotein preproprotein                                                                           | 6.02 | 14.17    | 95                   | 3                       | 15.6 | 0.24±0         | 0±0               | 0.00                 |
| 55  | gi 50083279  | centrosomal protein of 135 kDa                                                                            | 5.87 | 133.4    | 61                   | 2                       | 7.3  | no emPAI       | 0±0               | n/a                  |
| 56  | gi 109255230 | centrosomal protein of 170 kDa isoform beta                                                               | 6.77 | 164.4    | 73                   | 2                       | 6.2  | no emPAI       | 0±0               | n/a                  |
| 57  | gi 50083293  | centrosomal protein of 89 kDa                                                                             | 6.36 | 89.53    | 100                  | 2                       | 10.1 | 0±0            | no emPAI          | n/a                  |
| 58  | gi 4680717   | CGI-39 protein                                                                                            | 6.92 | 15.73    | 60                   | 2                       | 20   | 0.22±0         | 0±0               | 0.00                 |
| 59  | gi 11527207  | CGI-85                                                                                                    | 9.29 | 30.31    | 63                   | 2                       | 23   | no emPAI       | 0±0               | n/a                  |
| 60  | gi 145580001 | Chain A, Crystal Structure Of A Fragment Of The Plakin Domain Of Plectin                                  | 7.18 | 42.13    | 250                  | 7                       | 24.3 | 0.12±0         | no emPAI          | n/a                  |
| 61  | gi 395759492 | Chain A, Crystal Structure Of A Heat Shock 70kda Protein 2 (Hspa2) From Homo Sapiens At 1.80 A Resolution | 7.18 | 42.13    | 250                  | 7                       | 24.3 | 0.28±0.05      | no emPAI          | n/a                  |
| 62  | gi 349587814 | Chain A, Crystal Structure Of Full-Length Human Peroxiredoxin 4 In The Reduced Form                       | 6.1  | 27.95    | 67                   | 2                       | 13   | 0.25±0         | 0.14±0.01         | 0.54                 |

| No. | NCBI ID      | Protein                                                                                                             | pI    | MW (kDa) | Identification score | No. of matched peptides | %cov | Mock (Mean±SD) | Treated (Mean±SD) | Ratio (Treated/Mock) |
|-----|--------------|---------------------------------------------------------------------------------------------------------------------|-------|----------|----------------------|-------------------------|------|----------------|-------------------|----------------------|
| 63  | gi 83753119  | Chain A, Crystal Structure Of Human Full-Length Vinculin (Residues 1-1066)                                          | 5.34  | 14.73    | 157                  | 4                       | 60   | no emPAI       | 0.06±0.06         | n/a                  |
| 64  | gi 365813094 | Chain A, Crystal Structure Of Human Galectin-1 In Complex With Methyl 2-o- Acetyl-3-o-toluoyl-beta-d-talopyranoside | 5.34  | 14.73    | 157                  | 4                       | 60   | 0.26±0.26      | no emPAI          | n/a                  |
| 65  | gi 358440049 | Chain A, Crystal Structure Of Human Galectin-7 In Complex With A Galactose-Benzylphosphate Inhibitor                | 7.18  | 14.73    | 85                   | 3                       | 21.8 | 0.23±0         | 0.15±0.15         | 0.67                 |
| 66  | gi 609412460 | Chain A, Crystal Structure Of Human Lnk2b-h2a.z-anp32e                                                              | 10.22 | 22.46    | 310                  | 9                       | 12.9 | 2.35±0.21      | 1.23±0.67         | 0.52                 |
| 67  | gi 347447296 | Chain A, Crystal Structure Of Human Nucleosome Core Particle Containing H3k79q Mutation                             | 11.12 | 15.68    | 80                   | 3                       | 12.9 | 0.22±0         | 0±0               | 0.00                 |
| 68  | gi 110590538 | Chain A, Crystal Structure Of Human Pyrroline-5-carboxylate Synthetase                                              | 5.97  | 51.1     | 107                  | 3                       | 19   | 0±0            | no emPAI          | n/a                  |
| 69  | gi 122920033 | Chain A, Crystal Structure Of Rhogef Protein Asef                                                                   | 5.15  | 54.91    | 108                  | 3                       | 16.4 | no emPAI       | 0.50±0.50         | n/a                  |
| 70  | gi 374414590 | Chain A, Crystal Structure Of StabilisedVimentin Coil2 Fragment                                                     | 5.41  | 8.667    | 307                  | 9                       | 79.2 | 2.52±0.53      | no emPAI          | n/a                  |
| 71  | gi 520729524 | Chain A, Crystal Structure Of Substrate-free Human Presequence Protease                                             | 5.09  | 114.1    | 78                   | 3                       | 9.5  | no emPAI       | 0.10±0.10         | n/a                  |
| 72  | gi 134105326 | Chain A, Crystal Structure Of The First Hin-200 Domain Of Interferon-Inducible Protein 16                           | 9.39  | 23.63    | 62                   | 2                       | 16.5 | no emPAI       | 0.03±0.03         | n/a                  |
| 73  | gi 61680421  | Chain A, Crystal Structure Of The Hspbp1 Core Domain                                                                | 5.92  | 32.79    | 76                   | 2                       | 23.6 | no emPAI       | 0±0               | n/a                  |
| 74  | gi 290560068 | Chain A, Crystal Structure Of The Humanized Recombinant Fab Fragment Of A Murine; Antibody                          | 9.42  | 24.86    | 62                   | 2                       | 19.2 | 0.13±0         | 0±0               | 0.00                 |
| 75  | gi 342350777 | Chain A, Human Annexin V With Incorporated Methionine Analogue Azidohomoalanine                                     | 4.89  | 35.75    | 225                  | 10                      | 29.1 | 0.47±0.06      | 0.35±0.30         | 0.74                 |
| No. | NCBI ID      | Protein                                                                                                             | pI    | MW (kDa) | Identification score | No. of matched peptides | %cov | Mock (Mean±SD) | Treated (Mean±SD) | Ratio (Treated/Mock) |
| 76  | gi 157833780 | Chain A, Human Annexin V With Proline Substitution By Thioproline                                                   | 4.94  | 35.98    | 248                  | 11                      | 32.2 | 0.46±0.06      | no emPAI          | n/a                  |
| 77  | gi 325533397 | Chain A, Human Lamin A Coil 2b Fragment                                                                             | 5.46  | 8.661    | 231                  | 7                       | 60.8 | 1.69±1.02      | 0.03±0.03         | 0.02                 |
| 78  | gi 20149844  | Chain A, Human Vimentin Coil 1a Fragment (1a)                                                                       | 4.6   | 4.646    | 188                  | 7                       | 76.9 | 9.3±0          | no emPAI          | n/a                  |
| 79  | gi 723586843 | Chain A, Mitochondrial Adck3 Employs An Atypical Protein Kinase-like Fold To Enable Coenzyme Q Biosynthes           | 5.93  | 44.86    | 86                   | 3                       | 14.2 | no emPAI       | 0.19±0.10         | n/a                  |
| 80  | gi 392935428 | Chain A, Nmr Structure Of Npm1_c70                                                                                  | 9.52  | 8.494    | 130                  | 3                       | 47.3 | 0±0            | no emPAI          | n/a                  |
| 81  | gi 159162145 | Chain A, Rotamer Strain As A Determinant Of Protein Structural Specificity                                          | 6.56  | 8.56     | 95                   | 3                       | 61.8 | 0.6±0.27       | 0.26±0.17         | 0.42                 |
| 82  | gi 88191927  | Chain A, Structural Basis For Recognition Of Uuuoh 3~-Terminii Of Nascent Rna Pol Iii Transcripts By La Autoantigen | 5.89  | 22.66    | 71                   | 2                       | 19   | 0±0            | 0.08±0.08         | n/a                  |
| 83  | gi 47169316  | Chain A, Structure Of Pitp-Alpha Complexed To Phosphatidylinositol                                                  | 5.98  | 31.63    | 61                   | 2                       | 7.8  | 0±0            | no emPAI          | n/a                  |
| 84  | gi 31615803  | Chain A, Synthetic Ubiquitin With Fluoro-Leu At 50 And 67                                                           | 6.56  | 8.555    | 128                  | 3                       | 77.6 | 1.26±0.38      | 0±0.47            | 0.00                 |
| 85  | gi 809185    | Chain A, The Effect Of Metal Binding On The Structure Of                                                            | 4.94  | 35.78    | 287                  | 9                       | 31.7 | 0.47±0.06      | 0.01±0.01         | 0.02                 |

| 86  | gi 9955007   | Annexin V And Implications For Membrane Binding<br>Chain A, Thioredoxin Peroxidase B From Red Blood Cells             | 5.44  | 21.8     | 78                   | 3                       | 13.2 | 0.15±0         | no emPAI          | n/a                  |
|-----|--------------|-----------------------------------------------------------------------------------------------------------------------|-------|----------|----------------------|-------------------------|------|----------------|-------------------|----------------------|
| 87  | gi 56554343  | Chain A, X-Ray Crystal Structure Of C2s Human Galectin-1 Complexed With Galactose                                     | 5.12  | 14.63    | 159                  | 4                       | 50   | 0.52±0         | 0.23±0.12         | 0.44                 |
| 88  | gi 229597861 | Chain A, X-Ray Crystal Structure Of Coil 1a Of Human Vimentin                                                         | 4.35  | 4.674    | 198                  | 5                       | 76.9 | 4.1±3.72       | 5.24±2.85         | 1.28                 |
| 89  | gi 42542977  | Chain A, X-Ray Crystal Structure Of Human Galectin-1                                                                  | 5.34  | 14.58    | 123                  | 5                       | 57.5 | 0.26±0.26      | no emPAI          | n/a                  |
| No. | NCBI ID      | Protein                                                                                                               | pI    | MW (kDa) | Identification score | No. of matched peptides | %cov | Mock (Mean±SD) | Treated (Mean±SD) | Ratio (Treated/Mock) |
| 90  | gi 290790186 | Chain A, X-ray Crystal Structure Of Trf1 And Fbx4 Complex                                                             | 5.44  | 24.36    | 84                   | 3                       | 16.7 | no emPAI       | 0.35±0.33         | n/a                  |
| 91  | gi 374074124 | Chain B, Crystal Structure Of Human N12-II5, An Adcc And Non-Neutralizing Anti- Hiv-1 Env Antibody                    | 6.48  | 23.81    | 61                   | 2                       | 15.1 | 0.14±0         | 0±0               | 0.00                 |
| 92  | gi 347447327 | Chain B, Crystal Structure Of Human Nucleosome Core Particle Containing H4k31q Mutation                               | 11.36 | 11.64    | 171                  | 4                       | 41.5 | 1.17±0         | 0.77±0.33         | 0.60                 |
| 93  | gi 635576697 | Chain B, Crystal Structure Of SchizosaccharomycesPombe Sst2 Catalytic Domain And Ubiquitin                            | 6.78  | 8.971    | 94                   | 3                       | 63   | 0.31±0.44      | no emPAI          | n/a                  |
| 94  | gi 520729525 | Chain B, Crystal Structure Of Substrate-free Human Presequence Protease                                               | 5.02  | 114      | 64                   | 2                       | 10.5 | no emPAI       | 0±0               | n/a                  |
| 95  | gi 428697911 | Chain B, Structure Of Bcl-xl Bound To Bimlock                                                                         | 4.01  | 2.408    | 63                   | 2                       | 100  | no emPAI       | 0±0               | n/a                  |
| 96  | gi 208435632 | Chain C, Structural Insights Into Nedd8 Activation Of Cullin-Ring Ligases: Conformational Control Of Conjugation      | 8.97  | 44.63    | 115                  | 3                       | 18.1 | no emPAI       | 0±0               | n/a                  |
| 97  | gi 695722159 | Chain D, Structure Of Bg505 Sosip.664 In Complex With Broadly Neutralizing Antibodies, Pgt122 And 35o22               | 9.04  | 26.13    | 61                   | 2                       | 8.6  | 0.13±0         | 0±0               | 0.00                 |
| 98  | gi 340780331 | Chain D, The Structure Of The Centromeric Nucleosome Containing Cenp-A                                                | 10.31 | 14.12    | 187                  | 5                       | 41.9 | 0.46±0.65      | no emPAI          | n/a                  |
| 99  | gi 530537677 | Chain E, Structure Of An Rsp5xubxsna3 Complex: Mechanism Of Ubiquitin Ligation And Lysine Prioritization By A Hect E3 | 7.06  | 9.559    | 127                  | 4                       | 73.5 | 0.51±0.73      | 0.43±0.35         | 0.84                 |
| 100 | gi 588293128 | Chain H, Crystal Structure Of Human Fab Cap256-vrc26.10, A Potent V1v2-directed Hiv-1 Neutralizing Antibody           | 8.44  | 27.61    | 64                   | 2                       | 23.8 | 0.12±0         | 0±0               | 0.00                 |
| 101 | gi 230867    | Chain R, Twinning In Crystals Of Human Skeletal Muscle D-                                                             | 6.6   | 35.85    | 209                  | 4                       | 15.6 | 0.14±0.2       | 0.05±0.04         | 0.32                 |
| No. | NCBI ID      | Protein                                                                                                               | pI    | MW (kDa) | Identification score | No. of matched peptides | %cov | Mock (Mean±SD) | Treated (Mean±SD) | Ratio (Treated/Mock) |
| 102 | gi 13562153  | Glyceraldehyde-3- Phosphate Dehydrogenase channel-kinase 1                                                            | 8.16  | 212.5    | 65                   | 2                       | 4.1  | 0.08±0.06      | 0±0               | 0.00                 |
| 103 | gi 306890    | chaperonin (HSP60)                                                                                                    | 5.7   | 60.99    | 954                  | 17                      | 46.2 | 1.28±0.11      | 0.04±0.03         | 0.03                 |
| 104 | gi 3169116   | cICK0721Q.2 (60S Ribosomal Protein L12 LIKE protein)                                                                  | 9.57  | 17.92    | 112                  | 3                       | 13.3 | 0.19±0         | 0±0               | 0.00                 |
| 105 | gi 359385708 | cilia- and flagella-associated protein 46                                                                             | 7.07  | 303.3    | 68                   | 2                       | 3.6  | 0±0            | no emPAI          | n/a                  |
| 106 | gi 4758012   | clathrin heavy chain 1 isoform 1                                                                                      | 5.48  | 191.5    | 114                  | 3                       | 5.3  | 0.02±0         | 0.27±0.38         | 11.43                |
| 107 | gi 182383    | coagulation factor VIII                                                                                               | 6.95  | 266.8    | 87                   | 3                       | 5.3  | 0.01±0         | 0±0               | 0.00                 |
| 108 | gi 5031635   | cofilin-1                                                                                                             | 8.22  | 18.49    | 105                  | 3                       | 25.9 | 0.27±0.19      | 0±0.08            | 0.00                 |
| 109 | gi 38348729  | coiled-coil domain-containing protein 171                                                                             | 6.37  | 152.7    | 98                   | 3                       | 7.9  | no emPAI       | 0±0               | n/a                  |

|     |              |                                                          |      |       |      |    |      |           |           |      |
|-----|--------------|----------------------------------------------------------|------|-------|------|----|------|-----------|-----------|------|
| 110 | gi 32140760  | collagen alpha-1(XXVII) chain preproprotein              | 9.83 | 186.8 | 86   | 3  | 8.9  | no emPAI  | 0±0       | n/a  |
| 111 | gi 116256354 | collagen alpha-2(IV) chain preproprotein                 | 8.89 | 167.4 | 64   | 2  | 4.6  | 0±0       | 0.68±0.32 | n/a  |
| 112 | gi 156616290 | collagen alpha-6(VI) chain precursor                     | 6.44 | 247   | 60   | 2  | 5.3  | 0±0       | no emPAI  | n/a  |
| 113 | gi 13436464  | CPSF6 protein                                            | 6    | 52.29 | 93   | 3  | 10.5 | 0.03±0.03 | 0±0       | 0.00 |
| 114 | gi 181250    | cyclophilin, partial                                     | 9.33 | 22.6  | 62   | 2  | 6.3  | 0.15±0    | 0±0       | 0.00 |
| 115 | gi 381234392 | cytochrome c oxidase subunit II (mitochondrion)          | 4.67 | 25.55 | 118  | 3  | 11.9 | 0.28±0    | 0.07±0.07 | 0.23 |
| 116 | gi 545768875 | cytochrome c oxidase subunit II (mitochondrion)          | 4.67 | 25.6  | 67   | 2  | 16.3 | 0±0       | 0.07±0.06 | n/a  |
| 117 | gi 310776861 | cytochrome c oxidase subunit II                          | 4.76 | 25.54 | 117  | 3  | 14.5 | 0.28±0    | 0±0       | 0.00 |
| 118 | gi 310777477 | cytochrome c oxidase subunit II                          | 4.74 | 25.56 | 117  | 3  | 11.9 | 0.28±0    | 0.07±0.07 | 0.23 |
| 119 | gi 545768329 | cytochrome c oxidase subunit II, partial (mitochondrion) | 4.59 | 25.07 | 152  | 4  | 12.2 | 0.28±0    | 0.07±0.06 | 0.23 |
| 120 | gi 34035     | cytokeratin 18 (232 AA)                                  | 4.92 | 26.43 | 302  | 9  | 39.2 | 0.71±0.1  | 0.10±0.10 | 0.13 |
| 121 | gi 30311     | cytokeratin 18 (424 AA)                                  | 5.27 | 47.31 | 1072 | 17 | 56.6 | 1.9±0.40  | 0.88±0.73 | 0.46 |
| 122 | gi 181390    | cytokeratin 2                                            | 8.38 | 65.83 | 89   | 4  | 5    | 0±0       | 0.03±0.02 | n/a  |

| No. | NCBI ID      | Protein                                                                                      | pI   | MW (kDa) | Identification score | No. of matched peptides | %cov | Mock (Mean±SD) | Treated (Mean±SD) | Ratio (Treated/Mock) |
|-----|--------------|----------------------------------------------------------------------------------------------|------|----------|----------------------|-------------------------|------|----------------|-------------------|----------------------|
| 123 | gi 181573    | cytokeratin 8                                                                                | 5.52 | 53.53    | 877                  | 11                      | 30.7 | 1.18±0.21      | no emPAI          | n/a                  |
| 124 | gi 435476    | cytokeratin 9                                                                                | 5.19 | 62.09    | 437                  | 11                      | 25.4 | 0.59±0         | 0±0               | 0.00                 |
| 125 | gi 3901030   | cytokeratin type II                                                                          | 7.6  | 59.47    | 266                  | 8                       | 10.5 | 0.26±0.03      | 0±0               | 0.00                 |
| 126 | gi 2580550   | dead box, X isoform                                                                          | 6.73 | 73.23    | 96                   | 3                       | 8.3  | 0±0            | 0.01±0.01         | n/a                  |
| 127 | gi 119581895 | dedicator of cytokinesis 2, isoform CRA_a                                                    | 6.68 | 215.8    | 94                   | 3                       | 4.7  | 0±0            | 1.44±0.68         | n/a                  |
| 128 | gi 51095134  | dedicator of cytokinesis 4                                                                   | 7.44 | 225.1    | 64                   | 2                       | 3    | no emPAI       | 0±0               | n/a                  |
| 129 | gi 40804411  | deubiquitinating enzyme 3                                                                    | 8.05 | 59.57    | 84                   | 3                       | 10.9 | no emPAI       | 0.06±0.06         | n/a                  |
| 130 | gi 2181867   | DFFRY                                                                                        | 6.84 | 95.63    | 86                   | 3                       | 8.2  | no emPAI       | 0±0               | n/a                  |
| 131 | gi 62088586  | diacylglycerol kinase, theta variant                                                         | 5.06 | 240.9    | 67                   | 2                       | 2.8  | no emPAI       | 0±0               | n/a                  |
| 132 | gi 181575    | dihydrolipoamide dehydrogenase precursor                                                     | 8.2  | 54.24    | 77                   | 3                       | 7.5  | 0±0            | 1.78±2.44         | n/a                  |
| 133 | gi 4506675   | dolichyl-diphosphooligosaccharide--protein glycosyltransferase subunit 1 precursor           | 5.96 | 68.53    | 102                  | 3                       | 6.6  | 0.07±0.02      | 0.01±0.01         | 0.15                 |
| 134 | gi 209413738 | dolichyl-diphosphooligosaccharide--protein glycosyltransferase subunit 2 isoform 2 precursor | 5.7  | 67.68    | 62                   | 2                       | 3.3  | 0.05±0         | 0±0               | 0.00                 |
| 135 | gi 7963632   | dual oxidase                                                                                 | 8.12 | 177.2    | 90                   | 4                       | 5.3  | no emPAI       | 0±0               | n/a                  |
| 136 | gi 222144249 | dynein heavy chain domain-containing protein 1 isoform 1                                     | 6.25 | 533.3    | 104                  | 3                       | 2.6  | no emPAI       | 0±0               | n/a                  |
| 137 | gi 119585619 | dynein, axonemal, heavy polypeptide 1, isoform CRA_a                                         | 5.7  | 499.1    | 64                   | 2                       | 3.1  | 0±0            | 0.39±0.39         | n/a                  |
| 138 | gi 119602169 | dynein, cytoplasmic 1, heavy chain 1, isoform CRA_e                                          | 6.01 | 403.1    | 80                   | 3                       | 3.6  | no emPAI       | 0±0               | n/a                  |
| 139 | gi 663429604 | E3 ubiquitin-protein ligase TRIM36 isoform 4                                                 | 5.58 | 65.53    | 78                   | 3                       | 12   | no emPAI       | 0±0               | n/a                  |
| 140 | gi 704416    | elongation factor Tu                                                                         | 7.7  | 49.51    | 73                   | 3                       | 6.6  | 0.07±0         | 0±0               | 0.00                 |
| 141 | gi 7705029   | EMT                                                                                          | 7.51 | 71.87    | 82                   | 3                       | 6.3  | no emPAI       | 0±0               | n/a                  |
| 142 | gi 307133775 | endoribonuclease Dicer isoform 2                                                             | 5.5  | 208.3    | 91                   | 4                       | 7.9  | no emPAI       | 0±0               | n/a                  |

| No. | NCBI ID      | Protein                                                                                    | pI   | MW (kDa) | Identification score | No. of matched peptides | %cov | Mock (Mean±SD) | Treated (Mean±SD) | Ratio (Treated/Mock) |
|-----|--------------|--------------------------------------------------------------------------------------------|------|----------|----------------------|-------------------------|------|----------------|-------------------|----------------------|
| 143 | gi 526253086 | endothelial differentiation-related factor 1 isoform 3                                     | 9.88 | 15.63    | 65                   | 2                       | 19.9 | 0±0            | 0.01±0.01         | n/a                  |
| 144 | gi 862457    | enoyl-CoA hydratase/3-hydroxyacyl-CoA dehydrogenase alpha-subunit of trifunctional protein | 6.56 | 231.5    | 67                   | 2                       | 3    | 0.04±0         | 4.10±3.87         | n/a                  |
| 145 | gi 181402    | epidermal cytokeratin 2                                                                    | 8.07 | 65.83    | 336                  | 9                       | 9.1  | 0.41±0         | 4.75±4.41         | 11.51                |
| 146 | gi 14250470  | ERO1-like (S. cerevisiae)                                                                  | 5.62 | 54.36    | 89                   | 4                       | 12   | no emPAI       | 0±0               | n/a                  |
| 147 | gi 927065    | eukaryotic translation elongation factor 1 alpha 1-like 14                                 | 8.54 | 42.8     | 105                  | 3                       | 13.6 | 0.12±0.04      | 0±0               | 0.00                 |
| 148 | gi 63020636  | expressed in synovial lining protein                                                       | 9.23 | 199.3    | 80                   | 2                       | 4.4  | no emPAI       | 0.25±0.25         | n/a                  |
| 149 | gi 6063147   | ezrin                                                                                      | 9.19 | 19.22    | 84                   | 3                       | 23.9 | 0.18±0         | 0±0               | 0.00                 |
| 150 | gi 4502477   | F-box/WD repeat-containing protein 1A isoform 2                                            | 8.24 | 65.01    | 68                   | 2                       | 4.4  | 0±0            | 0.03±0.02         | n/a                  |
| 151 | gi 46559358  | fibrillin 1                                                                                | 4.81 | 312      | 101                  | 3                       | 9.5  | no emPAI       | 0±0               | n/a                  |

|     |              |                                                             |      |       |     |   |      |           |           |      |
|-----|--------------|-------------------------------------------------------------|------|-------|-----|---|------|-----------|-----------|------|
| 152 | gi 119593150 | filamin A, alpha (actin binding protein 280), isoform CRA_a | 5.7  | 248.4 | 117 | 3 | 5.9  | no emPAI  | 0±0       | n/a  |
| 153 | gi 744518    | FKBP-rapamycin-associated protein                           | 6.81 | 288.8 | 102 | 3 | 8.6  | no emPAI  | 0.33±0.33 | n/a  |
| 154 | gi 260268505 | FLJ00343 protein                                            | 5.77 | 281.3 | 145 | 4 | 7.3  | no emPAI  | 0±0       | n/a  |
| 155 | gi 119631344 | FLJ44048 protein, isoform CRA_a                             | 6.11 | 681.9 | 83  | 3 | 1.8  | no emPAI  | 0±0       | n/a  |
| 156 | gi 33341656  | FP1047                                                      | 6.76 | 69.35 | 140 | 4 | 14.1 | 0.07±0.02 | 0±0       | 0.00 |
| 157 | gi 58531795  | G protein-coupled receptor 112                              | 5.83 | 333.2 | 85  | 3 | 2.1  | no emPAI  | 0.18±0.16 | n/a  |
| 158 | gi 31645     | glyceraldehyde-3-phosphate dehydrogenase                    | 8.26 | 36.03 | 317 | 9 | 31.3 | 0.55±0    | 0.21±0.20 | 0.38 |
| 159 | gi 119567961 | hCG1643231, isoform CRA_b, partial                          | 8.21 | 35.28 | 75  | 2 | 7.7  | 0±0       | 0.05±0.05 | n/a  |
| 160 | gi 119585743 | hCG1779312, isoform CRA_a                                   | 5.63 | 452.5 | 139 | 4 | 5.1  | no emPAI  | 0±0       | n/a  |
| 161 | gi 119598268 | hCG1786960, partial                                         | 5.04 | 21.66 | 140 | 4 | 14.6 | 0.33±0    | 0±0       | 0.00 |
| 162 | gi 119607348 | hCG1810953, isoform CRA_c                                   | 6.9  | 89.19 | 96  | 3 | 13.9 | no emPAI  | 0±0       | n/a  |
| 163 | gi 119619489 | hCG1811351                                                  | 8.71 | 102.9 | 88  | 4 | 5.4  | no emPAI  | 0±0       | n/a  |
| 164 | gi 119620733 | hCG1818387                                                  | 6.3  | 14.49 | 66  | 2 | 30.3 | 0±0       | 0.12±0.11 | n/a  |

| No. | NCBI ID      | Protein                                                      | pI    | MW (kDa) | Identification score | No. of matched peptides | %cov | Mock (Mean±SD) | Treated (Mean±SD) | Ratio (Treated/Mock) |
|-----|--------------|--------------------------------------------------------------|-------|----------|----------------------|-------------------------|------|----------------|-------------------|----------------------|
| 165 | gi 119607256 | hCG1988300, isoform CRA_a                                    | 5.09  | 47.13    | 362                  | 9                       | 22.8 | 0.28±0.11      | 0.29±0.27         | 1.01                 |
| 166 | gi 119620881 | hCG1988320, isoform CRA_b                                    | 4.65  | 36.12    | 95                   | 3                       | 11.7 | 0.09±0         | 0±0               | 0.00                 |
| 167 | gi 119573587 | hCG1997137, isoform CRA_a                                    | 4.99  | 29.13    | 76                   | 2                       | 10   | 0±0            | 0.12±0.01         | n/a                  |
| 168 | gi 119589777 | hCG2005194, partial                                          | 9.4   | 25.24    | 63                   | 2                       | 15.3 | no emPAI       | 0±0               | n/a                  |
| 169 | gi 119626698 | hCG2042471, partial                                          | 5.14  | 5.344    | 87                   | 3                       | 35.4 | 0.68±0         | 0±0               | 0.00                 |
| 170 | gi 119576791 | hCG2043250, isoform CRA_b                                    | 9.23  | 111.2    | 74                   | 3                       | 4.6  | 0.02±0.02      | 0.23±0.12         | 15.33                |
| 171 | gi 119620305 | hCG21219, partial                                            | 6.19  | 106.8    | 180                  | 5                       | 6    | 0.03±0.03      | 0.02±0.02         | 0.50                 |
| 172 | gi 119631384 | hCG22236, isoform CRA_b, partial                             | 9.13  | 55.8     | 224                  | 6                       | 19.4 | 0.14±0.03      | 0.83±1.18         | 5.00                 |
| 173 | gi 119590144 | hCG22803, isoform CRA_e                                      | 6.93  | 499.2    | 75                   | 2                       | 3.2  | no emPAI       | 0±0               | n/a                  |
| 174 | gi 55749742  | HEAT repeat-containing protein 5B                            | 6.77  | 224.2    | 73                   | 3                       | 4.6  | no emPAI       | 0.06±0.06         | n/a                  |
| 175 | gi 119590566 | heat shock 10kDa protein 1 (chaperonin 10), isoform CRA_f    | 9.45  | 13.56    | 105                  | 3                       | 56.3 | 0.13±0.13      | 0±0               | 0.00                 |
| 176 | gi 12653415  | Heat shock 70kDa protein 9 (mortalin)                        | 6.03  | 73.68    | 171                  | 4                       | 8.2  | 0±0            | 0.08±0.06         | n/a                  |
| 177 | gi 5729877   | heat shock cognate 71 kDa protein isoform 1                  | 5.37  | 70.85    | 503                  | 11                      | 25.9 | 0.38±0.09      | 0.29±0.23         | 0.76                 |
| 178 | gi 386785    | heat shock protein                                           | 5.42  | 69.83    | 124                  | 4                       | 11.3 | 0.1±0          | 0.03±0.02         | 0.25                 |
| 179 | gi 4204880   | heat shock protein                                           | 5.56  | 69.95    | 305                  | 9                       | 17.7 | 0.22±0.03      | 0.13±0.18         | 0.58                 |
| 180 | gi 639910    | heat shock protein                                           | 7.85  | 13.76    | 86                   | 3                       | 38.4 | 0.25±0         | 0.31±0.44         | 1.25                 |
| 181 | gi 662841    | heat shock protein 27                                        | 7.83  | 22.31    | 78                   | 3                       | 8    | 0.15±0         | 0±0               | 0.00                 |
| 182 | gi 188492    | heat shock-induced protein                                   | 5.76  | 70.36    | 146                  | 4                       | 12.6 | 0.1±0          | 0.16±0.23         | 1.63                 |
| 183 | gi 14575679  | hemicentin                                                   | 6.05  | 613.3    | 97                   | 3                       | 4.4  | no emPAI       | 0±0               | n/a                  |
| 184 | gi 62898443  | heterogeneous nuclear ribonucleoprotein H3 isoform a variant | 6.8   | 36.9     | 98                   | 3                       | 14.2 | 0.09±0         | 2.38±2.24         | 26.39                |
| 185 | gi 14043072  | heterogeneous nuclear ribonucleoproteins A2/B1 isoform B1    | 8.97  | 37.41    | 436                  | 11                      | 51.6 | 0.97           | 0.41±0.34         | 0.42                 |
| 186 | gi 184484    | hexabrachion                                                 | 4.81  | 241.1    | 81                   | 2                       | 6.4  | 0±0            | no emPAI          | n/a                  |
| 187 | gi 50949256  | hHa7 protein                                                 | 4.93  | 45.74    | 92                   | 4                       | 7.3  | 0±0            | 0.24±0.18         | n/a                  |
| 188 | gi 4504431   | high mobility group protein HMGI-C                           | 10.63 | 11.83    | 63                   | 2                       | 21.1 | 0.29±0         | 0.06±0.09         | 0.22                 |

| No. | NCBI ID      | Protein                                                                    | pI    | MW (kDa) | Identification score | No. of matched peptides | %cov | Mock (Mean±SD) | Treated (Mean±SD) | Ratio (Treated/Mock) |
|-----|--------------|----------------------------------------------------------------------------|-------|----------|----------------------|-------------------------|------|----------------|-------------------|----------------------|
| 189 | gi 119569461 | isoform a<br>Histidine acid phosphatase domain containing 1, isoform CRA_a | 8.35  | 138      | 68                   | 2                       | 4.6  | 0±0            | 0.08±0.08         | n/a                  |
| 190 | gi 6002696   | histone acetyltransferase MORF beta                                        | 5.64  | 231.2    | 102                  | 3                       | 5.7  | no emPAI       | 0.21±0.21         | n/a                  |
| 191 | gi 4504239   | histone H2A type 1                                                         | 10.9  | 14.08    | 215                  | 6                       | 35.4 | 0±0            | 0.61±0.43         | n/a                  |
| 192 | gi 1568551   | histone H2B                                                                | 10.31 | 13.93    | 277                  | 8                       | 52.4 | 5.52±0.71      | 1±1.41            | 0.18                 |
| 193 | gi 10800140  | histone H2B type 1-B                                                       | 10.31 | 13.94    | 279                  | 8                       | 52.4 | 0±0            | 1.81±1.81         | n/a                  |
| 194 | gi 386772    | histone H3, partial                                                        | 10.99 | 15.24    | 71                   | 2                       | 15.6 | 0.07±0.1       | 4.76±4.33         | 64.91                |
| 195 | gi 4504301   | histone H4                                                                 | 11.36 | 11.36    | 65                   | 2                       | 18.4 | 0.61±0.61      | 0.23±0.12         | 0.38                 |
| 196 | gi 27544394  | homologue to Drosophila photoreceptor protein calphotin                    | 5.35  | 226.5    | 63                   | 2                       | 2.3  | no emPAI       | 0±0               | n/a                  |
| 197 | gi 321117267 | HSPE1-MOB4 protein                                                         | 5.79  | 29.72    | 94                   | 3                       | 22.6 | 0.11±0         | 0.06±0.05         | 0.50                 |
| 198 | gi 106322    | hypothetical protein (L1H 3~ region) - human                               | 9.64  | 149.3    | 64                   | 2                       | 3.1  | 0±0            | 0.39±0.20         | n/a                  |
| 199 | gi 30722305  | hypothetical protein                                                       | 5.66  | 222.8    | 168                  | 4                       | 9.6  | 0.01±0         | 0±0               | 0.00                 |

|     |              |                                                                          |       |       |    |   |      |          |           |      |
|-----|--------------|--------------------------------------------------------------------------|-------|-------|----|---|------|----------|-----------|------|
| 200 | gi 5262477   | hypothetical protein                                                     | 5.35  | 77.1  | 62 | 2 | 11.4 | no emPAI | 0.18±0.18 | n/a  |
| 201 | gi 7018420   | hypothetical protein                                                     | 12.94 | 31.7  | 67 | 2 | 7.5  | no emPAI | 0±0       | n/a  |
| 202 | gi 12052750  | hypothetical protein                                                     | 5.35  | 22.2  | 63 | 2 | 30.6 | no emPAI | 0±0       | n/a  |
| 203 | gi 51476230  | hypothetical protein                                                     | 8.51  | 247.5 | 84 | 3 | 3    | no emPAI | 0±0       | n/a  |
| 204 | gi 51476571  | hypothetical protein                                                     | 5.24  | 122   | 61 | 2 | 8.4  | no emPAI | 1.34±1.34 | n/a  |
| 205 | gi 31874124  | hypothetical protein                                                     | 6.02  | 270.2 | 95 | 3 | 3.6  | 0±0      | 0.01±0.01 | n/a  |
| 206 | gi 57997573  | hypothetical protein                                                     | 4.71  | 27.16 | 74 | 2 | 25.4 | 0±0      | 0.06±0.06 | n/a  |
| 207 | gi 119571008 | hypothetical protein                                                     | 8.47  | 47.51 | 62 | 2 | 12   | no emPAI | 0.05±0.05 | n/a  |
| 208 | gi 119568538 | DKFZp434N035, isoform CRA_b<br>IBR domain containing 1, isoform<br>CRA_e | 9.14  | 35.18 | 62 | 2 | 14.7 | no emPAI | 0±0       | n/a  |
| 209 | gi 524453580 | IgG H chain                                                              | 9.54  | 25    | 66 | 2 | 9    | 0.13±0   | no emPAI  | n/a  |
| 210 | gi 316996524 | immunoglobulin gamma heavy chain                                         | 9.1   | 23.69 | 63 | 2 | 12.6 | 0.14±0   | 0±0       | 0.00 |
| 211 | gi 39938102  | immunoglobulin heavy chain<br>variable                                   | 9.2   | 16.1  | 67 | 2 | 29.5 | 0.21±0   | 0.01±0.01 | 0.05 |

| No. | NCBI ID      | Protein                                                                                                      | pI   | MW (kDa) | Identification score | No. of matched peptides | %cov | Mock (Mean±SD) | Treated (Mean±SD) | Ratio (Treated/Mock) |
|-----|--------------|--------------------------------------------------------------------------------------------------------------|------|----------|----------------------|-------------------------|------|----------------|-------------------|----------------------|
| 212 | gi 39938240  | region<br>immunoglobulin heavy chain<br>variable region                                                      | 9.13 | 15.9     | 67                   | 2                       | 14.2 | 0.21±0         | no emPAI          | n/a                  |
| 213 | gi 37696952  | immunoglobulin heavy chain, VH<br>region                                                                     | 8.6  | 13.65    | 63                   | 2                       | 21.9 | 0.25±0         | 0.09±0.09         | 0.36                 |
| 214 | gi 323432570 | immunoglobulin variable region                                                                               | 8.51 | 15.46    | 73                   | 3                       | 22.7 | 0.22±0         | 0±0               | 0.00                 |
| 215 | gi 323432838 | immunoglobulin variable region                                                                               | 8.83 | 14.41    | 61                   | 2                       | 38.5 | 0.24±0         | 0±0               | 0.00                 |
| 216 | gi 323432832 | immunoglobulin variable region                                                                               | 9.41 | 15.77    | 63                   | 2                       | 30.6 | 0.22±0         | 0.03±0.03         | 0.14                 |
| 217 | gi 249616    | insulin-like growth factor I receptor,<br>IGF-IR [human, Peptide, 1367 aa]                                   | 5.58 | 154.7    | 61                   | 2                       | 3.7  | no emPAI       | 0±0               | n/a                  |
| 218 | gi 89213250  | intermediate filament family orphan<br>1 isoform 4                                                           | 4.89 | 62.44    | 68                   | 2                       | 9.6  | no emPAI       | 0.14±0.14         | n/a                  |
| 219 | gi 386848    | keratin                                                                                                      | 5.09 | 51.63    | 86                   | 3                       | 4.9  | 0±0            | 0.03±0.03         | n/a                  |
| 220 | gi 11935049  | keratin 1                                                                                                    | 8.16 | 66.03    | 353                  | 9                       | 23.6 | 0.26±0.37      | 0.11±0.09         | 0.40                 |
| 221 | gi 375314771 | keratin 1                                                                                                    | 8.15 | 66.01    | 720                  | 11                      | 32.9 | 0.93±0.05      | 0.53±0.53         | 0.57                 |
| 222 | gi 375314779 | keratin 1                                                                                                    | 8.15 | 66.03    | 651                  | 11                      | 31.7 | 0.79±0.07      | 1.08±1.01         | 1.36                 |
| 223 | gi 119581085 | keratin 10 (epidermolytic<br>hyperkeratosis; keratosis palmaris et<br>plantaris), isoform CRA_b              | 5.13 | 63.31    | 166                  | 4                       | 13.9 | 0±0            | 0.08±0.07         | n/a                  |
| 224 | gi 21961605  | Keratin 10                                                                                                   | 5.09 | 58.79    | 487                  | 14                      | 33.6 | 0.69±0.09      | 0±0               | 0.00                 |
| 225 | gi 12803709  | Keratin 14                                                                                                   | 5.09 | 51.62    | 402                  | 11                      | 23.5 | 0.45±0         | 0.01±0.02         | 0.03                 |
| 226 | gi 31074631  | keratin 1b                                                                                                   | 5.73 | 61.76    | 234                  | 7                       | 9.9  | 0.23±0         | no emPAI          | n/a                  |
| 227 | gi 20306864  | Keratin 23 (histone deacetylase<br>inducible)                                                                | 6.09 | 48.15    | 66                   | 2                       | 2.1  | 0.31±0.33      | 0±0               | 0.00                 |
| 228 | gi 119617038 | keratin 5 (epidermolysisbullosa<br>simplex, Dowling-<br>Meara/Kobner/Weber-Cockayne<br>types), isoform CRA_a | 5.91 | 38.55    | 367                  | 9                       | 28.9 | 0.69±0.07      | 0±0               | 0.00                 |
| 229 | gi 18999435  | Keratin 5                                                                                                    | 7.59 | 62.34    | 393                  | 9                       | 19.2 | 0.38±0.03      | 0±0               | 0.00                 |
| 230 | gi 119617032 | keratin 6B, isoform CRA_a<br>keratin 9                                                                       | 8.38 | 59.87    | 454                  | 14                      | 26.1 | 0.65±0.04      | 0±0               | 0.00                 |
| 231 | gi 119581148 | (epidermolyticpalmoplantarkeratoder<br>ma)                                                                   | 6.95 | 57.53    | 414                  | 11                      | 26.7 | 0.56±0         | 0.03±0.03         | 0.05                 |

| No. | NCBI ID     | Protein                                     | pI   | MW (kDa) | Identification score | No. of matched peptides | %cov | Mock (Mean±SD) | Treated (Mean±SD) | Ratio (Treated/Mock) |
|-----|-------------|---------------------------------------------|------|----------|----------------------|-------------------------|------|----------------|-------------------|----------------------|
| 232 | gi 186685   | keratin type 16                             | 4.97 | 50.67    | 78                   | 3                       | 6.4  | 0±0            | 0.04±0.04         | n/a                  |
| 233 | gi 908803   | keratin type II                             | 8.09 | 60.19    | 476                  | 14                      | 27   | 0.64±0.04      | 0.02±0.03         | 0.03                 |
| 234 | gi 4504927  | keratin, type I cuticular Ha6               | 4.9  | 52.21    | 91                   | 4                       | 6.2  | 0.03±0.03      | 0.06±0.03         | 2.00                 |
| 235 | gi 4557701  | keratin, type I cytoskeletal 17             | 4.97 | 48.08    | 208                  | 4                       | 16.7 | 0.22±0         | 0.03±0.02         | 0.11                 |
| 236 | gi 4504935  | keratin, type II cuticular Hb5 isoform<br>1 | 6.28 | 55.77    | 107                  | 3                       | 13.2 | 0.03±0.03      | 0±0               | 0.00                 |
| 237 | gi 67782365 | keratin, type II cytoskeletal 7             | 5.4  | 51.35    | 778                  | 11                      | 34.3 | 1.72±0.23      | 0.49±0.41         | 0.29                 |
| 238 | gi 28173564 | keratin, type II cytoskeletal 73            | 6.93 | 58.89    | 165                  | 4                       | 8.5  | 0.22±0.03      | 0.03±0.03         | 0.14                 |
| 239 | gi 32567786 | keratin, type II cytoskeletal 79            | 6.75 | 57.8     | 229                  | 7                       | 11.6 | 0.2±0.03       | 0.03±0.03         | 0.15                 |
| 240 | gi 6633953  | KIAA0097 protein                            | 8.11 | 225.9    | 142                  | 6                       | 6.6  | no emPAI       | 0±0               | n/a                  |
| 241 | gi 40788922 | KIAA0236                                    | 8.27 | 188.7    | 65                   | 2                       | 5.4  | no emPAI       | 0±0               | n/a                  |
| 242 | gi 51105855 | KIAA0241 protein                            | 6.22 | 79.44    | 78                   | 3                       | 7.9  | 0±0            | no emPAI          | n/a                  |
| 243 | gi 3043584  | KIAA0530 protein                            | 8.81 | 173.4    | 62                   | 2                       | 5.6  | no emPAI       | 0±0               | n/a                  |
| 244 | gi 40788287 | KIAA0555 protein                            | 5.81 | 93.85    | 78                   | 3                       | 9.6  | no emPAI       | 0.05±0.05         | n/a                  |



|     |              |                                  |       |       |      |    |      |           |           |      |
|-----|--------------|----------------------------------|-------|-------|------|----|------|-----------|-----------|------|
| 245 | gi 40788370  | KIAA0801 protein                 | 9.33  | 120   | 70   | 2  | 9.5  | no emPAI  | 0.04±0.04 | n/a  |
| 246 | gi 7243019   | KIAA1319 protein                 | 5.44  | 137.5 | 71   | 2  | 5.9  | no emPAI  | 0±0       | n/a  |
| 247 | gi 7959231   | KIAA1485 protein                 | 6.97  | 123.5 | 62   | 2  | 8.2  | no emPAI  | 0±0       | n/a  |
| 248 | gi 34328020  | KIAA1564 protein                 | 6.47  | 274.9 | 89   | 4  | 4.1  | no emPAI  | 0±0       | n/a  |
| 249 | gi 219520798 | KIAA1671 protein                 | 8.64  | 196.5 | 99   | 3  | 7.3  | no emPAI  | 0±0       | n/a  |
| 250 | gi 86577784  | KIAA1683 protein                 | 10.27 | 147.3 | 79   | 3  | 8    | no emPAI  | 0±0       | n/a  |
| 251 | gi 24899176  | KIAA2005 protein                 | 8.19  | 184.8 | 94   | 3  | 2.8  | no emPAI  | 0±0       | n/a  |
| 252 | gi 119573383 | lamin A/C, isoform CRA_c         | 8.91  | 87.32 | 1591 | 17 | 50.9 | 1.66±0.15 | 0.21±0.21 | 0.13 |
| 253 | gi 27436946  | lamin isoform A                  | 6.57  | 74.1  | 1464 | 17 | 50.5 | 0±0       | 0.98±0.80 | n/a  |
| 254 | gi 383792150 | lamin isoform D                  | 6.3   | 63.85 | 935  | 11 | 43.2 | 0±0       | 0.82±0.45 | n/a  |
| 255 | gi 5031877   | lamin-B1 isoform 1               | 5.11  | 66.37 | 219  | 6  | 15.9 | 0.19±0.03 | 0.05±0.05 | n/a  |
| 256 | gi 34230     | Laminin                          | 5.79  | 130.8 | 63   | 2  | 7.9  | no emPAI  | 0±0       | n/a  |
| 257 | gi 34234     | laminin-binding protein, partial | 4.84  | 31.77 | 292  | 9  | 33   | 0.28±0.21 | 0±0.10    | 0.00 |

| No. | NCBI ID      | Protein                                                                       | pI   | MW (kDa) | Identification score | No. of matched peptides | %cov | Mock (Mean±SD) | Treated (Mean±SD) | Ratio (Treated/Mock) |
|-----|--------------|-------------------------------------------------------------------------------|------|----------|----------------------|-------------------------|------|----------------|-------------------|----------------------|
| 258 | gi 19550955  | ligase III, DNA, ATP-dependent                                                | 9.15 | 95.74    | 79                   | 3                       | 14.3 | no emPAI       | 0±0               | n/a                  |
| 259 | gi 4505983   | liprin-alpha-1 isoform b                                                      | 5.91 | 135.7    | 104                  | 3                       | 4.8  | 0±0            | 0.01±0.01         | n/a                  |
| 260 | gi 72534477  | low-density lipoprotein receptor-related protein 4                            | 5.14 | 216.2    | 73                   | 3                       | 6.8  | no emPAI       | 0.12±0.12         | n/a                  |
| 261 | gi 187281    | M4 protein                                                                    | 8.99 | 77.56    | 114                  | 3                       | 16.9 | 0.04±0.06      | 0.40±0.19         | 9.23                 |
| 262 | gi 2906146   | malate dehydrogenase precursor                                                | 8.92 | 35.51    | 137                  | 4                       | 27.5 | 0.2±0          | 0.10±0.05         | 0.50                 |
| 263 | gi 21735621  | malate dehydrogenase, mitochondrial isoform 1 precursor                       | 8.92 | 35.48    | 114                  | 3                       | 13.3 | 0±0            | 0.09±0.05         | n/a                  |
| 264 | gi 139948432 | matrix-remodeling-associated protein 5 precursor                              | 8.57 | 312      | 77                   | 2                       | 3.8  | no emPAI       | 0.02±0.02         | n/a                  |
| 265 | gi 119619130 | matrix-remodelling associated 5                                               | 8.36 | 237.5    | 75                   | 2                       | 5.5  | no emPAI       | 0±0               | n/a                  |
| 266 | gi 10945428  | membrane-associated guanylate kinase MAGI3                                    | 6.04 | 126      | 71                   | 2                       | 8.1  | no emPAI       | 0±0               | n/a                  |
| 267 | gi 4504143   | metabotropic glutamate receptor 5 isoform b precursor                         | 7.59 | 128.8    | 61                   | 2                       | 8.7  | no emPAI       | 0±0               | n/a                  |
| 268 | gi 3779244   | metalloprotease 1                                                             | 6.56 | 117.5    | 89                   | 4                       | 4    | no emPAI       | 0±0               | n/a                  |
| 269 | gi 633257783 | methionine synthase isoform 3                                                 | 5.38 | 96.08    | 73                   | 3                       | 8.3  | no emPAI       | 2.37±2.37         | n/a                  |
| 270 | gi 566559863 | methylcytosine dioxygenase TET3                                               | 8.04 | 193.6    | 69                   | 2                       | 5.8  | no emPAI       | 0±0               | n/a                  |
| 271 | gi 189502784 | mitochondrial heat shock 60kD protein 1 variant 1                             | 5.83 | 60.64    | 1005                 | 17                      | 46   | 1.42±0.12      | 0.67±0.63         | 0.47                 |
| 272 | gi 8131894   | mitofilin                                                                     | 5.57 | 68.15    | 77                   | 3                       | 13.4 | no emPAI       | 0±0               | n/a                  |
| 273 | gi 14625824  | moesi0naplastic lymphoma kinase fusion protein                                | 7.61 | 61.83    | 99                   | 3                       | 15.9 | 0±0            | 0.06±0            | n/a                  |
| 274 | gi 4505257   | moesin                                                                        | 6.08 | 67.78    | 103                  | 3                       | 12   | 0.05±0         | 0±0               | 0.00                 |
| 275 | gi 119616397 | monogenic, audiogenic seizure susceptibility 1 homolog (mouse), isoform CRA_f | 4.55 | 681.7    | 76                   | 2                       | 1.1  | no emPAI       | 0±0               | n/a                  |
| 276 | gi 30984034  | M-phase phosphoprotein 1                                                      | 5.75 | 129.7    | 66                   | 2                       | 6.2  | no emPAI       | 0±0               | n/a                  |
| 277 | gi 292059    | MTHSP75                                                                       | 5.97 | 73.73    | 188                  | 5                       | 11.5 | 0.12±0.05      | 0±0               | 0.00                 |
| 278 | gi 83367077  | mucin-16                                                                      | 5.13 | 1518     | 131                  | 3                       | 2    | no emPAI       | 0±0               | n/a                  |

| No. | NCBI ID      | Protein                                              | pI   | MW (kDa) | Identification score | No. of matched peptides | %cov | Mock (Mean±SD) | Treated (Mean±SD) | Ratio (Treated/Mock) |
|-----|--------------|------------------------------------------------------|------|----------|----------------------|-------------------------|------|----------------|-------------------|----------------------|
| 279 | gi 1228049   | multifunctional protein CAD                          | 6    | 242.8    | 85                   | 3                       | 4.9  | no emPAI       | 0±0               | n/a                  |
| 280 | gi 28336     | mutant beta-actin (beta~actin)                       | 5.22 | 41.79    | 1041                 | 17                      | 57.1 | 3.31±0.67      | 2.39±0.99         | 0.72                 |
| 281 | gi 119600972 | MYC binding protein 2, isoform CRA_c                 | 6.63 | 509.4    | 64                   | 2                       | 2.6  | no emPAI       | 0±0               | n/a                  |
| 282 | gi 62088568  | myeloid/lymphoid or mixed-lineage leukemia 2 variant | 6.96 | 293      | 67                   | 2                       | 2.7  | no emPAI       | 0±0               | n/a                  |
| 283 | gi 6731237   | myoferlin                                            | 5.87 | 229.6    | 169                  | 4                       | 12.4 | 0.05±0.02      | 0±0               | 0.00                 |
| 284 | gi 7305053   | myoferlin isoform a                                  | 5.84 | 234.6    | 197                  | 5                       | 11.4 | 0.04±0.03      | 0±0               | 0.00                 |
| 285 | gi 8705240   | myosin 5c                                            | 7.69 | 202.7    | 81                   | 2                       | 3.3  | 0±0            | no emPAI          | n/a                  |
| 286 | gi 20338988  | myosin heavy chain                                   | 6.44 | 285.1    | 71                   | 2                       | 5.4  | no emPAI       | 0±0               | n/a                  |
| 287 | gi 20338989  | myosin heavy chain                                   | 6.45 | 285.1    | 74                   | 3                       | 5.4  | no emPAI       | 0±0               | n/a                  |
| 288 | gi 1235670   | myosin VIIA                                          | 8.78 | 254.2    | 69                   | 2                       | 6.2  | no emPAI       | 0±0               | n/a                  |
| 289 | gi 150010558 | myosin-15 precursor                                  | 5.67 | 224.5    | 108                  | 3                       | 5.9  | no emPAI       | 0±0               | n/a                  |
| 290 | gi 18650666  | myosin-like protein                                  | 6.44 | 285.1    | 88                   | 4                       | 5.2  | no emPAI       | 0±0               | n/a                  |
| 291 | gi 806562    | nebulin                                              | 9.1  | 772.7    | 150                  | 4                       | 5.1  | no emPAI       | 0±0               | n/a                  |
| 292 | gi 119631906 | nebulin, isoform CRA_c                               | 9.14 | 348      | 70                   | 2                       | 3.7  | no emPAI       | 0±0               | n/a                  |
| 293 | gi 119631909 | nebulin, isoform CRA_f                               | 9.12 | 777.4    | 148                  | 4                       | 5.4  | no emPAI       | 0±0               | n/a                  |
| 294 | gi 119631910 | nebulin, isoform CRA_g                               | 9.1  | 772.5    | 71                   | 2                       | 3.8  | 0±0            | no emPAI          | n/a                  |
| 295 | gi 22164066  | neuroblastoma-amplified protein                      | 5.62 | 268.3    | 69                   | 2                       | 2.8  | no emPAI       | 0±0               | n/a                  |

|     |              |                                                                 |      |       |     |   |     |           |             |      |
|-----|--------------|-----------------------------------------------------------------|------|-------|-----|---|-----|-----------|-------------|------|
| 296 | gi 119580210 | neurofilament, heavy polypeptide 200kDa, isoform CRA_c          | 5.02 | 64.4  | 99  | 3 | 6.8 | 0.05±0    | 0±0         | 0.00 |
| 297 | gi 994844    | neurofilament-66                                                | 5.48 | 54.88 | 154 | 4 | 13  | 0.02±0.03 | 0.04±0.03   | 2.00 |
| 298 | gi 35046     | NF-M                                                            | 4.9  | 102.4 | 121 | 4 | 6.3 | 0.02±0.02 | 0±0         | 0.00 |
| 299 | gi 119584784 | NIMA (never in mitosis gene a)-related kinase 10, isoform CRA_c | 7.84 | 82.83 | 73  | 2 | 5.8 | 0.04±0    | 0±0         | 0.00 |
| 300 | gi 10048399  | non-gastric H <sup>+</sup> ,K <sup>+</sup> -ATPase              | 6.12 | 115.8 | 79  | 3 | 7.1 | no emPAI  | 0±0         | n/a  |
| 301 | gi 641958    | non-muscle myosin B                                             | 5.44 | 228.8 | 68  | 2 | 4.8 | 0±0       | 2.83±1.42   | n/a  |
| 302 | gi 15213542  | NSD1                                                            | 7.73 | 284.8 | 90  | 4 | 5.4 | 0±0       | 1.87±0.0.94 | n/a  |

| No. | NCBI ID      | Protein                                                                     | pI   | MW (kDa) | Identification score | No. of matched peptides | %cov | Mock (Mean±SD) | Treated (Mean±SD) | Ratio (Treated/Mock) |
|-----|--------------|-----------------------------------------------------------------------------|------|----------|----------------------|-------------------------|------|----------------|-------------------|----------------------|
| 303 | gi 1699027   | nuclear corepressor KAP-1                                                   | 5.52 | 88.48    | 93                   | 3                       | 5.4  | 0.04±0.02      | 0.08±0.08         | 2.00                 |
| 304 | gi 378404903 | nucleolar protein 4-like isoform 1                                          | 5.53 | 74.18    | 61                   | 2                       | 4.7  | no emPAI       | 0±0               | n/a                  |
| 305 | gi 189306    | nucleolin                                                                   | 4.59 | 76.3     | 128                  | 4                       | 5.9  | 0.06±0.02      | 0±0               | 0.00                 |
| 306 | gi 609342    | nucleophosmin-anaplastic lymphoma kinase fusion protein                     | 6.44 | 75.27    | 130                  | 3                       | 6.9  | 0.09±0.08      | 0.14±0.07         | 1.50                 |
| 307 | gi 1314308   | nucleophosmin-retinoic acid receptor alpha fusion protein NPM-RAR long form | 5.85 | 62.53    | 148                  | 4                       | 10.7 | 0.15±0.05      | 0.09±0.08         | 0.57                 |
| 308 | gi 68533069  | NUMA1 variant protein                                                       | 5.64 | 238.7    | 81                   | 2                       | 2.5  | no emPAI       | 0±0               | n/a                  |
| 309 | gi 144226847 | obscurin-like protein 1 isoform 1 precursor                                 | 5.42 | 206.8    | 61                   | 2                       | 3.3  | no emPAI       | 0±0               | n/a                  |
| 310 | gi 672717919 | ornithine decarboxylase antizyme 3 isoform 3                                | 5.37 | 23.2     | 61                   | 2                       | 12.3 | no emPAI       | 0±0               | n/a                  |
| 311 | gi 940536    | P1 Cdc21 protein                                                            | 8.39 | 103      | 72                   | 2                       | 8.1  | 0.03±0.01      | 0±0               | 0.00                 |
| 312 | gi 2695876   | P2Y-like G-protein coupled receptor                                         | 9.77 | 33.38    | 69                   | 2                       | 3.7  | 0.1±0.05       | 0.18±0.18         | 1.75                 |
| 313 | gi 119601461 | pecanex homolog (Drosophila), isoform CRA_d                                 | 7.85 | 181.2    | 81                   | 2                       | 4.2  | no emPAI       | 0±0               | n/a                  |
| 314 | gi 450277    | pericentriol material 1                                                     | 4.99 | 228.6    | 90                   | 4                       | 3.3  | no emPAI       | 0±0               | n/a                  |
| 315 | gi 189034    | perinatal myosin heavy chain                                                | 5.64 | 222.5    | 70                   | 2                       | 4    | 0.01±0.01      | no emPAI          | n/a                  |
| 316 | gi 4505725   | peroxisome biogenesis factor 1 isoform 1                                    | 5.91 | 142.8    | 90                   | 2                       | 5.2  | 0.02±0         | 0±0               | 0.00                 |
| 317 | gi 10518469  | phosphoinositide-specific phospholipase C PLC-epsilon                       | 6.08 | 258.7    | 106                  | 3                       | 5.3  | no emPAI       | 0±0               | n/a                  |
| 318 | gi 68533059  | PIK4CA variant protein                                                      | 6.77 | 238.5    | 73                   | 2                       | 4    | no emPAI       | 0±0               | n/a                  |
| 319 | gi 1296662   | plectin                                                                     | 6.77 | 238.5    | 89                   | 4                       | 4.4  | 0.16±0.06      | 0.07±0.05         | 0.45                 |
| 320 | gi 119602580 | plectin 1, intermediate filament binding protein 500kDa, isoform CRA_d      | 5.59 | 286.1    | 557                  | 11                      | 11.1 | 0.06±0.05      | 0.04±0.04         | 0.75                 |
| 321 | gi 119599645 | plexin D1, isoform CRA_b                                                    | 6.86 | 212      | 62                   | 2                       | 4.9  | 0±0            | no emPAI          | n/a                  |
| 322 | gi 2627129   | polyubiquitin                                                               | 7.13 | 68.45    | 90                   | 4                       | 7.7  | 0.1±0          | 0.01±0            | 0.05                 |
| 323 | gi 190201    | porin                                                                       | 5.87 | 35.11    | 119                  | 3                       | 15.6 | no emPAI       | 0±0               | n/a                  |

| No. | NCBI ID      | Protein                                                     | pI   | MW (kDa) | Identification score | No. of matched peptides | %cov | Mock (Mean±SD) | Treated (Mean±SD) | Ratio (Treated/Mock) |
|-----|--------------|-------------------------------------------------------------|------|----------|----------------------|-------------------------|------|----------------|-------------------|----------------------|
| 324 | gi 134133226 | POTE ankyrin domain family member E                         | 5.83 | 121.3    | 606                  | 13                      | 13.9 | 0.2±0          | 0±0               | 0.00                 |
| 325 | gi 145309046 | POTE-2 alpha-actin                                          | 5.86 | 121.3    | 615                  | 14                      | 15   | 0.2±0          | 0.07±0.07         | 0.35                 |
| 326 | gi 10834674  | PP3781                                                      | 9.54 | 13.59    | 64                   | 2                       | 29.6 | no emPAI       | 0±0               | n/a                  |
| 327 | gi 578823648 | PREDICTED: acetyl-CoA carboxylase 2 isoform X7              | 6    | 254.9    | 88                   | 4                       | 4    | no emPAI       | 0±0               | n/a                  |
| 328 | gi 578819304 | PREDICTED: ankyrin-3 isoform X10                            | 6.03 | 481.5    | 78                   | 3                       | 2.8  | 0±0            | 0.10±0.09         | n/a                  |
| 329 | gi 578820976 | PREDICTED: CD44 antigen isoform X13                         | 5.15 | 44.36    | 70                   | 2                       | 6.5  | 0.08±0.08      | 0.04±0.04         | n/a                  |
| 330 | gi 530400856 | PREDICTED: centrosomal protein of 290 kDa isoform X4        | 6.14 | 234.7    | 70                   | 2                       | 5    | 0±0            | 0.09±0.05         | n/a                  |
| 331 | gi 530422334 | PREDICTED: dedicator of cytokinesis protein 11 isoform X1   | 7.79 | 239      | 93                   | 3                       | 7    | no emPAI       | 0±0               | n/a                  |
| 332 | gi 530383946 | PREDICTED: DNA polymerase zeta catalytic subunit isoform X3 | 8.27 | 302      | 104                  | 2                       | 3.9  | no emPAI       | 0±0               | n/a                  |
| 333 | gi 530405220 | PREDICTED: E3 ubiquitin-protein ligase HERC2 isoform X2     | 5.88 | 522.6    | 118                  | 3                       | 4.2  | no emPAI       | 0±0               | n/a                  |
| 334 | gi 530371173 | PREDICTED: E3 ubiquitin-protein ligase TRIP12 isoform X5    | 5.8  | 213.9    | 105                  | 3                       | 4.6  | no emPAI       | 0±0               | n/a                  |

| 335 | gi 578805102 | PREDICTED: fer-1-like protein 5 isoform X1                                          | 8.34  | 239.2    | 75                   | 2                       | 6.5  | no emPAI       | 0±0               | n/a                  |
|-----|--------------|-------------------------------------------------------------------------------------|-------|----------|----------------------|-------------------------|------|----------------|-------------------|----------------------|
| 336 | gi 530427501 | PREDICTED: heterogeneous nuclear ribonucleoprotein M isoform X1                     | 8.85  | 75.99    | 102                  | 3                       | 17.3 | 0.07±0.07      | 0±0               | 0.00                 |
| 337 | gi 530377637 | PREDICTED: histone H2A.Z isoform X1                                                 | 10.65 | 16.64    | 104                  | 3                       | 20.4 | 0.2±0          | 0±0               | 0.00                 |
| 338 | gi 530400232 | PREDICTED: keratin, type II cuticular Hb3 isoform X1                                | 5.4   | 49.65    | 84                   | 3                       | 9.2  | 0.07±0.04      | 0±0               | 0.00                 |
| 339 | gi 530406711 | PREDICTED: kinesin-like protein KIF23 isoform X1                                    | 8.75  | 111.6    | 67                   | 2                       | 6.1  | no emPAI       | 0±0               | n/a                  |
| 340 | gi 530383700 | PREDICTED: laminin subunit alpha-2 isoform X1                                       | 6.13  | 353.4    | 83                   | 3                       | 5.2  | no emPAI       | 0±0               | n/a                  |
| 341 | gi 530426079 | PREDICTED: leucine zipper putative tumor suppressor 3 isoform X1                    | 7.1   | 74.79    | 67                   | 2                       | 5.4  | no emPAI       | 0±0               | n/a                  |
| No. | NCBI ID      | Protein                                                                             | pI    | MW (kDa) | Identification score | No. of matched peptides | %cov | Mock (Mean±SD) | Treated (Mean±SD) | Ratio (Treated/Mock) |
| 342 | gi 578823097 | PREDICTED: LOW QUALITY PROTEIN: putative uncharacterized protein FLJ45355           | 11.2  | 18.24    | 77                   | 3                       | 26.9 | no emPAI       | 0±0               | n/a                  |
| 343 | gi 530365988 | PREDICTED: lysosomal-trafficking regulator isoform X2                               | 6.13  | 423.5    | 90                   | 4                       | 2.7  | no emPAI       | 0±0               | n/a                  |
| 344 | gi 578812715 | PREDICTED: metabotropic glutamate receptor 1 isoform X2                             | 9     | 114.7    | 76                   | 2                       | 9.2  | no emPAI       | 0±0               | n/a                  |
| 345 | gi 530362268 | PREDICTED: microtubule-actin cross-linking factor 1 isoform X1                      | 5.22  | 873      | 200                  | 4                       | 3.9  | no emPAI       | 0±0               | n/a                  |
| 346 | gi 578798816 | PREDICTED: microtubule-actin cross-linking factor 1 isoform X18                     | 5.25  | 855.4    | 198                  | 5                       | 4.1  | no emPAI       | 0±0               | n/a                  |
| 347 | gi 530410154 | PREDICTED: myosin phosphatase Rho-interacting protein isoform X1                    | 5.91  | 247.1    | 107                  | 3                       | 4.8  | 0.01±0         | 0.67±0.62         | 67.00                |
| 348 | gi 530420509 | PREDICTED: myotubularin-related protein 3 isoform X3                                | 5.89  | 134.9    | 65                   | 2                       | 2.7  | 0±0            | no emPAI          | n/a                  |
| 349 | gi 578818486 | PREDICTED: partitioning defective 3 homolog isoform X16                             | 7.02  | 130      | 62                   | 2                       | 2.1  | no emPAI       | 0±0               | n/a                  |
| 350 | gi 530378738 | PREDICTED: PDZ domain-containing protein 2 isoform X1                               | 7.22  | 305.3    | 91                   | 4                       | 3.4  | no emPAI       | 0.01±0.01         | n/a                  |
| 351 | gi 530420794 | PREDICTED: plexin-B2 isoform X1                                                     | 6.03  | 213.8    | 81                   | 2                       | 8    | no emPAI       | 0±0               | n/a                  |
| 352 | gi 578838663 | PREDICTED: probable phospholipid-transporting ATPase IG isoform X2                  | 6.27  | 127.9    | 81                   | 2                       | 6.5  | no emPAI       | 0.03±0.03         | n/a                  |
| 353 | gi 578824299 | PREDICTED: protein FAM186B isoform X3                                               | 8.98  | 100.1    | 92                   | 3                       | 5.7  | no emPAI       | 0±0               | n/a                  |
| 354 | gi 578827087 | PREDICTED: pyruvate kinase PKM isoform X4                                           | 8.18  | 65.76    | 79                   | 3                       | 11.7 | 0±0            | 0.10±0.05         | n/a                  |
| 355 | gi 578821897 | PREDICTED: rho guanine nucleotide exchange factor 17 isoform X1                     | 5.7   | 115.8    | 75                   | 2                       | 7.9  | no emPAI       | 0±0               | n/a                  |
| 356 | gi 578802305 | PREDICTED: ryanodine receptor 2 isoform X5                                          | 5.7   | 564.6    | 64                   | 2                       | 3.2  | no emPAI       | 0±0               | n/a                  |
| 357 | gi 578802398 | PREDICTED: serine/threonine-protein kinase MRCK alpha isoform X12                   | 5.31  | 115.2    | 86                   | 3                       | 5.6  | 0.03±0         | 0±0               | 0.00                 |
| No. | NCBI ID      | Protein                                                                             | pI    | MW (kDa) | Identification score | No. of matched peptides | %cov | Mock (Mean±SD) | Treated (Mean±SD) | Ratio (Treated/Mock) |
| 358 | gi 530369917 | PREDICTED: shugoshin-like 2 isoform X1                                              | 7.98  | 145.3    | 69                   | 2                       | 8.4  | no emPAI       | 0±0               | n/a                  |
| 359 | gi 530387113 | PREDICTED: single-stranded DNA-binding protein, mitochondrial isoform X1            | 10.1  | 18.55    | 118                  | 3                       | 20.1 | 0±0            | 0.20±0.19         | n/a                  |
| 360 | gi 53037374  | PREDICTED: succinyl-CoA ligase [GDP-forming] subunit beta, mitochondrial isoform X1 | 7.57  | 41.41    | 76                   | 2                       | 19.3 | no emPAI       | 0±0               | n/a                  |
| 361 | gi 578826302 | PREDICTED: thyroid receptor-interacting protein 11 isoform X4                       | 5.18  | 227.4    | 68                   | 2                       | 5.3  | no emPAI       | 0±0               | n/a                  |
| 362 | gi 530406404 | PREDICTED: tropomyosin alpha-1 chain isoform X11                                    | 4.85  | 31.73    | 64                   | 2                       | 14.5 | 0±0            | 0.1±0.05          | n/a                  |

|     |              |                                                                                   |      |       |     |    |      |           |           |      |
|-----|--------------|-----------------------------------------------------------------------------------|------|-------|-----|----|------|-----------|-----------|------|
| 363 | gi 426331707 | PREDICTED: tropomyosin alpha-3 chain isoform 6 [Gorilla gorilla gorilla]          | 4.73 | 33.2  | 103 | 3  | 17.5 | 0.10±0.05 | 0±0       | 0.00 |
| 364 | gi 530415144 | PREDICTED: ubiquitin-60S ribosomal protein L40 isoform X1                         | 9.18 | 22.23 | 142 | 4  | 34   | 0.17±0.25 | 0.16±0.13 | 0.92 |
| 365 | gi 578825530 | PREDICTED: uncharacterized protein C14orf37 isoform X1                            | 4.56 | 72.02 | 64  | 2  | 7.5  | no emPAI  | 0±0       | n/a  |
| 366 | gi 578799996 | PREDICTED: uncharacterized protein KIAA1751 isoform X2                            | 6.76 | 179.5 | 82  | 3  | 3.3  | no emPAI  | 0±0       | n/a  |
| 367 | gi 530370925 | PREDICTED: X-ray repair cross-complementing protein 5 isoform X1                  | 8.28 | 93.46 | 62  | 2  | 6.2  | 0.04±0.04 | no emPAI  | n/a  |
| 368 | gi 578829796 | PREDICTED: zinc finger ZZ-type and EF-hand domain-containing protein 1 isoform X4 | 6.13 | 211.9 | 77  | 3  | 5    | no emPAI  | 0±0       | n/a  |
| 369 | gi 46198230  | P-Rex2                                                                            | 7.5  | 182.5 | 101 | 3  | 7.5  | no emPAI  | 0±0       | n/a  |
| 370 | gi 359718912 | probable E3 ubiquitin-protein ligase HECTD4                                       | 5.79 | 469.7 | 60  | 2  | 2.6  | no emPAI  | 0±0       | n/a  |
| 371 | gi 9507143   | probable G-protein coupled receptor 173                                           | 9.36 | 41.45 | 65  | 2  | 10.5 | no emPAI  | 0±0       | n/a  |
| 372 | gi 119609105 | prohibitin 2                                                                      | 9.77 | 32.26 | 248 | 7  | 21.5 | 0.58±0.07 | 0.19±0.13 | 0.32 |
| 373 | gi 4505773   | prohibitin isoform 1                                                              | 5.57 | 29.79 | 635 | 14 | 59.2 | 2.97±0    | 0.95±0.89 | 0.32 |
| 374 | gi 1218058   | prohormoneconvertase 5 precursor,                                                 | 7    | 99.98 | 89  | 4  | 8.1  | 0.03±0    | 0±0       | 0.00 |

| No. | NCBI ID      | Protein                                                                                                                                                                                                             | pI   | MW (kDa) | Identification score | No. of matched peptides | %cov | Mock (Mean±SD) | Treated (Mean±SD) | Ratio (Treated/Mock) |
|-----|--------------|---------------------------------------------------------------------------------------------------------------------------------------------------------------------------------------------------------------------|------|----------|----------------------|-------------------------|------|----------------|-------------------|----------------------|
| 375 | gi 24416439  | partial ProSAPiP1 protein                                                                                                                                                                                           | 6.36 | 66.44    | 68                   | 2                       | 7.7  | no emPAI       | 0±0               | n/a                  |
| 376 | gi 12963885  | prostate antigen PARIS-1                                                                                                                                                                                            | 6.05 | 104.1    | 63                   | 2                       | 4    | 0±0            | 0.01±0.01         | n/a                  |
| 377 | gi 32880208  | protein diaphanous homolog 3 isoform b                                                                                                                                                                              | 5.83 | 98.08    | 82                   | 3                       | 2.8  | 0.02±0.02      | 0±0               | 0.00                 |
| 378 | gi 506773    | protein S100-A9                                                                                                                                                                                                     | 5.71 | 13.23    | 125                  | 4                       | 38.6 | 0.26±0         | 0±0               | 0.00                 |
| 379 | gi 27497737  | protein tyrosine phosphatase                                                                                                                                                                                        | 6.99 | 84.42    | 88                   | 4                       | 12.7 | no emPAI       | 0±0               | n/a                  |
| 380 | gi 4505893   | proteolipid protein 2                                                                                                                                                                                               | 6.79 | 16.68    | 61                   | 2                       | 8.6  | 0.07±0.09      | 0.10±0.09         | 1.50                 |
| 381 | gi 4885489   | proto-oncogene serine/threonine-protein kinase mos                                                                                                                                                                  | 9.15 | 37.8     | 66                   | 2                       | 5.5  | no emPAI       | 0±0               | n/a                  |
| 382 | gi 61966919  | putative protein FAM47C                                                                                                                                                                                             | 6.74 | 115.3    | 89                   | 4                       | 6.2  | no emPAI       | 0±0               | n/a                  |
| 383 | gi 387011    | pyruvate dehydrogenase E1-alpha precursor, partial                                                                                                                                                                  | 8.79 | 46.24    | 70                   | 2                       | 8    | no emPAI       | 0±0               | n/a                  |
| 384 | gi 119620329 | RAB1A, member RAS oncogene family, isoform CRA_f                                                                                                                                                                    | 8.81 | 28.13    | 79                   | 3                       | 23   | 0.12±0         | 0±0               | 0.00                 |
| 385 | gi 119620331 | RAB1A, member RAS oncogene family, isoform CRA_h                                                                                                                                                                    | 8.71 | 11.74    | 68                   | 2                       | 29.4 | 0.29±0         | 0±0               | 0.00                 |
| 386 | gi 355390217 | Ras-related protein Rab-15 isoform AN2                                                                                                                                                                              | 6.27 | 13.77    | 68                   | 3                       | 18.5 | 0.25±0         | 0±0               | 0.00                 |
| 387 | gi 13569962  | ras-related protein Rab-1B                                                                                                                                                                                          | 5.55 | 22.16    | 82                   | 2                       | 22.9 | 0.15±0         | 0±0               | 0.00                 |
| 388 | gi 5803135   | ras-related protein Rab-35 isoform 1                                                                                                                                                                                | 8.52 | 23.01    | 72                   | 2                       | 19.9 | 0.15±0         | 0±0               | 0.00                 |
| 389 | gi 47116772  | RecName: Full=Latrophilin-3; AltName: Full=Calcium-independent alpha-latrotoxin receptor 3; Short=CIRL-3; AltName: Full=Lectomedin-3; Flags: Precursor                                                              | 5.99 | 161.7    | 60                   | 2                       | 2.8  | no emPAI       | 0±0               | n/a                  |
| 390 | gi 338817989 | RecName: Full=Microtubule-actin cross-linking factor 1, isoforms 1/2/3/5; AltName: Full=620 kDa actin-binding protein; Short=ABP620; AltName: Full=Actin cross-linking family protein 7; AltName: Full=Macrophin-1; | 5.28 | 837.8    | 111                  | 2                       | 3.5  | 0±0            | 0.21±0.11         | n/a                  |

| No. | NCBI ID     | Protein                                                                                                     | pI   | MW (kDa) | Identification score | No. of matched peptides | %cov | Mock (Mean±SD) | Treated (Mean±SD) | Ratio (Treated/Mock) |
|-----|-------------|-------------------------------------------------------------------------------------------------------------|------|----------|----------------------|-------------------------|------|----------------|-------------------|----------------------|
| 391 | gi 74739412 | AltName: Full=Trabeculin-alpha [Homo RecName: Full=Putative beta-actin-like protein 3; AltName: Full=Kappa- | 5.28 | 837.8    | 128                  | 3                       | 3.2  | 0.35±0         | 0.08±0.08         | 0.23                 |

|     |              |                                                                                                                   |       |       |     |   |      |           |           |      |
|-----|--------------|-------------------------------------------------------------------------------------------------------------------|-------|-------|-----|---|------|-----------|-----------|------|
|     |              | actin; AltName: Full=POTE ankyrin domain family member K                                                          |       |       |     |   |      |           |           |      |
| 392 | gi 158518381 | RecName: Full=Putative heat shock 70 kDa protein 7; AltName: Full=Heat shock 70 kDa protein B                     | 7.72  | 40.22 | 68  | 2 | 6    | 0.08±0    | 0±0       | 0.00 |
| 393 | gi 136066    | RecName: Full=Triosephosphateisomerase; Short=TIM; AltName: Full=Triose-phosphate isomerase [Oryctolagusuniculus] | 7.1   | 26.61 | 124 | 4 | 28.6 | 0.27±0    | 0.07±0.06 | 0.24 |
| 394 | gi 90101849  | RecName: Full=Uromodulin-like 1; AltName: Full=Olfactorin; Flags: Precursor                                       | 5.75  | 144.2 | 85  | 3 | 5.8  | no emPAI  | 0±0       | n/a  |
| 395 | gi 21361458  | rho guanine nucleotide exchange factor 17                                                                         | 5.9   | 221.5 | 69  | 2 | 4.9  | no emPAI  | 0±0       | n/a  |
| 396 | gi 808090    | ribosomal protein L21                                                                                             | 10.26 | 18.5  | 71  | 2 | 9.4  | 0±0       | 0.09±0.09 | n/a  |
| 397 | gi 119584991 | ribosomal protein SA, isoform CRA_c                                                                               | 8.37  | 19.63 | 227 | 6 | 53.6 | 0.44±0.44 | 0.61±0.31 | 1.39 |
| 398 | gi 307383    | RNA helicase A                                                                                                    | 6.17  | 142   | 93  | 3 | 10.7 | no emPAI  | 0.03±0.02 | n/a  |
| 399 | gi 337722    | ryanodine receptor                                                                                                | 5.19  | 564.1 | 78  | 3 | 3.3  | 0±0       | 0.06±0.03 | n/a  |
| 400 | gi 337930    | scar protein                                                                                                      | 9.95  | 27.39 | 62  | 2 | 10.2 | 0.04±0.06 | 0±0       | 0.00 |
| 401 | gi 33313303  | SCCA1/SCCA2 fusion protein                                                                                        | 6.19  | 44.74 | 159 | 4 | 21.3 | 0.15±0    | 0±0       | 0.00 |
| 402 | gi 33317676  | SCCA2/SCCA1 fusion protein isoform 1                                                                              | 5.99  | 44.62 | 127 | 4 | 19.7 | 0.07±0    | 0±0       | 0.00 |
| 403 | gi 21307630  | septin 1                                                                                                          | 5.56  | 42.39 | 64  | 2 | 4    | no emPAI  | 0±0       | n/a  |
| 404 | gi 119605885 | serine/arginine repetitive matrix 2, isoform CRA_c                                                                | 12.09 | 288.2 | 175 | 5 | 6.9  | no emPAI  | 0±0       | n/a  |
| 405 | gi 5902076   | serine/arginine-rich splicing factor 1 isoform 1                                                                  | 10.37 | 27.73 | 162 | 4 | 27.4 | 0.47±0    | 0.02±0.01 | 0.04 |

| No. | NCBI ID      | Protein                                                                                                    | pI   | MW (kDa) | Identification score | No. of matched peptides | %cov | Mock (Mean±SD) | Treated (Mean±SD) | Ratio (Treated/Mock) |
|-----|--------------|------------------------------------------------------------------------------------------------------------|------|----------|----------------------|-------------------------|------|----------------|-------------------|----------------------|
| 406 | gi 28076869  | serpin B4 isoform 1                                                                                        | 5.86 | 44.83    | 119                  | 3                       | 20.3 | 0.07±0         | 0±0               | 0.00                 |
| 407 | gi 19263767  | Similar to cytoskeleton-associated protein 4, partial                                                      | 5.51 | 62.02    | 183                  | 5                       | 15   | 0.13±0.03      | 0.23±0.11         | 1.77                 |
| 408 | gi 4506975   | solute carrier family 12 member 2 isoform 1                                                                | 5.98 | 131.4    | 66                   | 2                       | 8.4  | no emPAI       | 0±0               | n/a                  |
| 409 | gi 119610275 | solute carrier family 25 (mitochondrial carrier; adenine nucleotide translocator), member 5, isoform CRA_b | 9.6  | 27.61    | 350                  | 9                       | 42.2 | 1.06±0.11      | 0.75±0.70         | 0.70                 |
| 410 | gi 15928608  | Solute carrier family 25 (mitochondrial carrier; adenine nucleotide translocator), member 6                | 9.76 | 32.91    | 343                  | 9                       | 31.9 | 0.52±0.37      | 0.58±0.55         | 1.12                 |
| 411 | gi 119568122 | spectrin repeat containing, nuclear envelope 1, isoform CRA_k                                              | 5.38 | 1008     | 135                  | 5                       | 3.7  | no emPAI       | 0±0               | n/a                  |
| 412 | gi 6006515   | spliceosomal protein SAP 130                                                                               | 5.15 | 135.5    | 87                   | 4                       | 3.5  | 0±0            | 0.02±0.01         | n/a                  |
| 413 | gi 119627828 | splicing factor proline/glutamine-rich (polypyrimidine tract binding protein associated), isoform CRA_c    | 9.41 | 67.77    | 100                  | 2                       | 11.7 | 0.03±0.02      | 0.10±0.05         | 4.00                 |
| 414 | gi 4826998   | splicing factor, proline- and glutamine-rich                                                               | 9.45 | 76.1     | 139                  | 4                       | 10.7 | 0.04±0.04      | 0.07±0.06         | 1.50                 |
| 415 | gi 29825635  | squamous cell carcinoma antigen 2                                                                          | 5.99 | 44.76    | 98                   | 3                       | 28.5 | no emPAI       | 0±0               | n/a                  |
| 416 | gi 260436922 | suprabasin isoform 1 precursor                                                                             | 6.5  | 60.51    | 64                   | 2                       | 5.6  | 0.05±0         | 0±0               | 0.00                 |
| 417 | gi 27451602  | tau-tubulin kinase                                                                                         | 6.58 | 182.4    | 107                  | 3                       | 7.2  | 0.02±0.01      | 0±0               | 0.00                 |
| 418 | gi 124376546 | T-box 18                                                                                                   | 9.06 | 64.81    | 70                   | 2                       | 6.4  | no emPAI       | 0±0               | n/a                  |
| 419 | gi 1848277   | telomerase-associated protein TP-1                                                                         | 8.17 | 290.2    | 92                   | 4                       | 3.4  | no emPAI       | 0±0               | n/a                  |
| 420 | gi 188528648 | tenascin-X isoform 1 precursor                                                                             | 5.05 | 457.9    | 116                  | 3                       | 4.9  | no emPAI       | 0±0               | n/a                  |
| 421 | gi 58331272  | terminal uridylyltransferase 7 isoform 1                                                                   | 6.4  | 171.1    | 66                   | 2                       | 3.4  | no emPAI       | 0±0               | n/a                  |
| 422 | gi 4838145   | tetrodotoxin-resistant voltage-gated sodium channel                                                        | 5.67 | 220.4    | 63                   | 2                       | 2.1  | no emPAI       | 0±0               | n/a                  |
| 423 | gi 4378531   | thioredoxinreductase                                                                                       | 7.24 | 56.49    | 76                   | 2                       | 13.9 | no emPAI       | 0±0               | n/a                  |
| 424 | gi 5802974   | thioredoxin-dependent peroxide                                                                             | 7.67 | 27.68    | 94                   | 3                       | 16   | 0.26±0         | 0±0               | 0.00                 |
| No. | NCBI ID      | Protein                                                                                                    | pI   | MW (kDa) | Identification score | No. of matched peptides | %cov | Mock (Mean±SD) | Treated (Mean±SD) | Ratio (Treated/Mock) |

|     |              |                                                                                            |      |       |      |    |      |           |           |      |
|-----|--------------|--------------------------------------------------------------------------------------------|------|-------|------|----|------|-----------|-----------|------|
| 425 | gi 27764565  | reductase, mitochondrial isoform a precursor                                               | 7.55 | 59.33 | 110  | 3  | 5.9  | 0.07±0.05 | 0.03±0.03 | 0.41 |
| 426 | gi 257467636 | TPA_exp: keratin 5c                                                                        |      |       |      |    |      |           |           |      |
| 426 | gi 257467636 | TPR and ankyrin repeat-containing protein 1                                                | 6.34 | 336   | 81   | 2  | 3    | no emPAI  | 0±0       | n/a  |
| 427 | gi 31652242  | transcription factor 20 isoform 2                                                          | 9.19 | 209.5 | 86   | 3  | 5.3  | no emPAI  | 0±0       | n/a  |
| 428 | gi 460789    | transformation upregulated nuclear protein                                                 | 5.13 | 51.04 | 92   | 4  | 12.5 | 0.06±0    | 0±0       | 0.00 |
| 429 | gi 119622920 | transient receptor potential cation channel, subfamily M, member 5, isoform CRA_b, partial | 6.27 | 132.4 | 65   | 2  | 1.8  | no emPAI  | 0.07±0.07 | n/a  |
| 430 | gi 6005942   | transitional endoplasmic reticulum ATPase                                                  | 5.14 | 89.27 | 75   | 2  | 2.7  | 0±0       | 0.11±0.07 | n/a  |
| 431 | gi 37267     | transketolase                                                                              | 7.9  | 67.75 | 73   | 3  | 6.6  | 0.1±0     | 0.03±0.02 | 0.25 |
| 432 | gi 1903414   | translation repressor NAT1                                                                 | 6.57 | 102.1 | 63   | 2  | 7.5  | no emPAI  | 0±0       | n/a  |
| 433 | gi 118421085 | treslin                                                                                    | 9    | 210.7 | 71   | 2  | 9.6  | no emPAI  | 0±0       | n/a  |
| 434 | gi 12311759  | type I hair keratin 8                                                                      | 4.79 | 50.46 | 77   | 2  | 6.1  | 0±0       | 0.04±0.04 | n/a  |
| 435 | gi 31074641  | type I inner root sheath specific keratin 25 irs3                                          | 5.06 | 49.79 | 159  | 4  | 12   | 0.21±0    | 0±0       | 0.00 |
| 436 | gi 31074643  | type I inner root sheath specific keratin 25 irs4                                          | 5.33 | 50.56 | 171  | 4  | 13.1 | 0.21±0    | 0.04±0.03 | 0.17 |
| 437 | gi 2950168   | type I keratin                                                                             | 4.87 | 47.2  | 71   | 2  | 3.8  | 0.07±0    | 0.04±0.04 | 0.50 |
| 438 | gi 1195531   | type I keratin 16                                                                          | 4.99 | 51.21 | 457  | 13 | 29.4 | 0.55±0    | 0±0       | 0.00 |
| 439 | gi 22798968  | type II hair keratin 2                                                                     | 6.4  | 56.65 | 63   | 2  | 1.4  | 0.03±0.03 | 0±0       | 0.00 |
| 440 | gi 4885409   | vigilin isoform a                                                                          | 6.43 | 141.4 | 73   | 3  | 5.1  | no emPAI  | 0±0       | n/a  |
| 441 | gi 47115317  | VIM                                                                                        | 5.09 | 53.55 | 1677 | 18 | 74.5 | 4.37±3.34 | 5.76±2.37 | 1.32 |
| 442 | gi 5030431   | vimentin                                                                                   | 4.82 | 41.54 | 1292 | 17 | 62.1 | 5.53±1.04 | 0±0       | 0.00 |
| 443 | gi 62414289  | vimentin                                                                                   | 5.06 | 53.62 | 1880 | 18 | 74   | 4.62±4.62 | 3.08±3.08 | 0.67 |
| 444 | gi 25188179  | voltage-dependent anion-selective channel protein 3 isoform 1                              | 6.6  | 110.2 | 77   | 3  | 6.2  | 0±0       | 0.11±0.05 | n/a  |

| No. | NCBI ID      | Protein                                                 | pI    | MW (kDa) | Identification score | No. of matched peptides | %cov | Mock (Mean±SD) | Treated (Mean±SD) | Ratio (Treated/Mock) |
|-----|--------------|---------------------------------------------------------|-------|----------|----------------------|-------------------------|------|----------------|-------------------|----------------------|
| 445 | gi 14970562  | WDR9 protein, form A                                    | 8.73  | 262.8    | 75                   | 2                       | 3.5  | no emPAI       | 0±0               | n/a                  |
| 446 | gi 1160186   | white                                                   | 8.04  | 75.12    | 68                   | 2                       | 8.8  | 0±0            | no emPAI          | n/a                  |
| 447 | gi 119372317 | xin actin-binding repeat-containing protein 2 isoform 1 | 5.95  | 401.9    | 68                   | 2                       | 2.6  | no emPAI       | 0±0               | n/a                  |
| 448 | gi 4503841   | X-ray repair cross-complementing protein 6 isoform 1    | 6.23  | 69.8     | 89                   | 4                       | 13   | 0±0            | 0.03±0.02         | n/a                  |
| 449 | gi 1205999   | YRRM, partial                                           | 11.73 | 4.474    | 66                   | 2                       | 69.8 | no emPAI       | 0±0               | n/a                  |
| 450 | gi 18652806  | zinc-induced metallothionein 2A/1A hybrid               | 8.23  | 6.113    | 62                   | 2                       | 78.7 | no emPAI       | 0±0               | n/a                  |

NCBI = National Center for Biotechnology Information. %Cov. = %Sequence coverage [(number of the matched residues/total number of residues in the entire sequence) x 100%]. DIV/0 = Divide by zero. emPAI = Exponentially modified protein abundance index. n/a = not available.

#### Supplement 4 . Alteration of structural molecule activity proteins in EA.hy926 cells during DENV2 infection and TNF- $\alpha$ treatment.

| No. | NCBI ID      | Protein                                                          | pI   | MW (kDa) | Identification score | No. of matched peptides | %cov | Mock (Mean±SD) | Treated (Mean±SD) | Ratio (Treated/Mock) |
|-----|--------------|------------------------------------------------------------------|------|----------|----------------------|-------------------------|------|----------------|-------------------|----------------------|
| 1   | gi 20149844  | Chain A, Human Vimentin Coil 1a Fragment (1a)                    | 4.6  | 4.646    | 188                  | 7                       | 76.9 | 9.3±0          | no emPAI          | n/a                  |
| 2   | gi 374414590 | Chain A, Crystal Structure Of Stabilised Vimentin Coil2 Fragment | 5.41 | 8.667    | 307                  | 9                       | 79.2 | 2.52±0.53      | no emPAI          | n/a                  |
| 3   | gi 4501881   | actin, alpha skeletal muscle                                     | 5.23 | 42.024   | 705                  | 15                      | 41.4 | 1.84±0.38      | no emPAI          | n/a                  |

|    |              |                                  |      |         |      |    |      |           |           |     |
|----|--------------|----------------------------------|------|---------|------|----|------|-----------|-----------|-----|
| 4  | gi 181573    | cytokeratin 8                    | 5.52 | 53.529  | 877  | 11 | 30.7 | 1.18±0.21 | no emPAI  | n/a |
|    |              | Chain B, Crystal Structure Of    |      |         |      |    |      |           |           |     |
| 5  | gi 635576697 | Schizosaccharomyces Pombe Sst2   | 6.78 | 8.971   | 94   | 3  | 63   | 0.31±0.44 | no emPAI  | n/a |
|    |              | Catalytic Domain And Ubiquitin   |      |         |      |    |      |           |           |     |
| 6  | gi 31074631  | keratin 1b                       | 5.73 | 61.763  | 234  | 7  | 9.9  | 0.23±0    | no emPAI  | n/a |
|    |              | Chain A, Crystal Structure Of A  |      |         |      |    |      |           |           |     |
| 7  | gi 145580001 | Fragment Of The Plakin Domain    | 7.18 | 42.13   | 250  | 7  | 24.3 | 0.12±0    | no emPAI  | n/a |
|    |              | Of Plectin                       |      |         |      |    |      |           |           |     |
| 8  | gi 219524    | cardiac alpha-myosin heavy chain | 5.63 | 223.414 | 114  | 3  | 4.5  | 0.01±0    | no emPAI  | n/a |
| 9  | gi 189034    | perinatal myosin heavy chain     | 5.64 | 222.525 | 70   | 2  | 4    | 0.01±0.01 | no emPAI  | n/a |
| 10 | gi 212293358 | actinin alpha 1 isoform 3        | 5.38 | 107.074 | 157  | 4  | 5.1  | 0±0       | 0.03±0.02 | n/a |
| 11 | gi 12053672  | beta-myosin heavy chain          | 5.63 | 222.963 | 72   | 2  | 6.1  | 0±0       | 0.11±0.06 | n/a |
| 12 | gi 29727     | cardiac beta myosin heavy chain  | 5.62 | 222.849 | 79   | 3  | 5.9  | 0±0       | no emPAI  | n/a |
| 13 | gi 181390    | cytokeratin 2                    | 8.38 | 65.83   | 89   | 4  | 5    | 0±0       | 0.03±0.02 | n/a |
| 14 | gi 386848    | keratin                          | 5.09 | 51.63   | 86   | 3  | 4.9  | 0±0       | 0.03±0.03 | n/a |
| 15 | gi 186685    | keratin type 16                  | 4.97 | 50.668  | 78   | 3  | 6.4  | 0±0       | 0.04±0.04 | n/a |
| 16 | gi 27436946  | lamin isoform A                  | 6.57 | 74.095  | 1464 | 17 | 50.5 | 0±0       | 0.98±0.80 | n/a |
| 17 | gi 383792150 | lamin isoform D                  | 6.3  | 63.854  | 935  | 11 | 43.2 | 0±0       | 0.82±0.45 | n/a |
| 18 | gi 8705240   | myosin 5c                        | 7.69 | 202.666 | 81   | 2  | 3.3  | 0±0       | no emPAI  | n/a |
| 19 | gi 641958    | non-muscle myosin B              | 5.44 | 228.798 | 68   | 2  | 4.8  | 0±0       | 2.83±1.42 | n/a |

RecName: Full=Microtubule-actin  
cross-linking factor 1, isoforms  
1/2/3/5; AltName: Full=620 kDa;

| No. | NCBI ID      | Protein                                                                                                                                                               | pI    | MW<br>(kDa) | Identification<br>score | No. of<br>matched<br>peptides | %cov | Mock<br>(Mean±SD) | Treated<br>(Mean±SD) | Ratio<br>(Treated/Mock) |
|-----|--------------|-----------------------------------------------------------------------------------------------------------------------------------------------------------------------|-------|-------------|-------------------------|-------------------------------|------|-------------------|----------------------|-------------------------|
| 20  | gi 338817989 | actin-binding protein;<br>Short=ABP620AltName:<br>Full=Actin cross-linking family<br>protein 7; AltName:<br>Full=Macrophin-1; AltName:<br>Full=Trabeculin-alpha [Homo | 5.28  | 837.787     | 111                     | 2                             | 3.5  | 0±0               | 0.21±0.11            | n/a                     |
| 21  | gi 808090    | ribosomal protein L21                                                                                                                                                 | 10.26 | 18.503      | 71                      | 2                             | 9.4  | 0±0               | 0.09±0.09            | n/a                     |
| 22  | gi 12311759  | type I hair keratin 8                                                                                                                                                 | 4.79  | 50.457      | 77                      | 2                             | 6.1  | 0±0               | 0.04±0.04            | n/a                     |
| 23  | gi 51476571  | hypothetical protein                                                                                                                                                  | 5.24  | 122.013     | 61                      | 2                             | 8.4  | no emPAI          | 1.34±1.34            | n/a                     |
| 24  | gi 4502247   | armadillo repeat protein deleted in<br>velo-cardio-facial syndrome                                                                                                    | 6.38  | 104.577     | 99                      | 3                             | 8.5  | no emPAI          | 0±0                  | n/a                     |
| 25  | gi 38348729  | coiled-coil domain-containing<br>protein 171                                                                                                                          | 6.37  | 152.714     | 98                      | 3                             | 7.9  | no emPAI          | 0±0                  | n/a                     |
| 26  | gi 222144249 | dynein heavy chain domain-<br>containing protein 1 isoform 1                                                                                                          | 6.25  | 533.305     | 104                     | 3                             | 2.6  | no emPAI          | 0±0                  | n/a                     |
| 27  | gi 46559358  | fibrillin 1                                                                                                                                                           | 4.81  | 312.006     | 101                     | 3                             | 9.5  | no emPAI          | 0±0                  | n/a                     |
| 28  | gi 260268505 | FLJ00343 protein                                                                                                                                                      | 5.77  | 281.288     | 145                     | 4                             | 7.3  | no emPAI          | 0±0                  | n/a                     |
| 29  | gi 6633953   | KIAA0097 protein                                                                                                                                                      | 8.11  | 225.893     | 142                     | 6                             | 6.6  | no emPAI          | 0±0                  | n/a                     |
| 30  | gi 7243019   | KIAA1319 protein                                                                                                                                                      | 5.44  | 137.518     | 71                      | 2                             | 5.9  | no emPAI          | 0±0                  | n/a                     |
| 31  | gi 20338988  | myosin heavy chain                                                                                                                                                    | 6.44  | 285.056     | 71                      | 2                             | 5.4  | no emPAI          | 0±0                  | n/a                     |
| 32  | gi 20338989  | myosin heavy chain                                                                                                                                                    | 6.45  | 285.06      | 74                      | 3                             | 5.4  | no emPAI          | 0±0                  | n/a                     |
| 33  | gi 1235670   | myosin VIIA                                                                                                                                                           | 8.78  | 254.245     | 69                      | 2                             | 6.2  | no emPAI          | 0±0                  | n/a                     |
| 34  | gi 150010558 | myosin-15 precursor                                                                                                                                                   | 5.67  | 224.479     | 108                     | 3                             | 5.9  | no emPAI          | 0±0                  | n/a                     |
| 35  | gi 18650666  | myosin-like protein                                                                                                                                                   | 6.44  | 285.075     | 88                      | 4                             | 5.2  | no emPAI          | 0±0                  | n/a                     |
| 36  | gi 144226847 | obscurin-like protein 1 isoform 1<br>precursor                                                                                                                        | 5.42  | 206.817     | 61                      | 2                             | 3.3  | no emPAI          | 0±0                  | n/a                     |
| 37  | gi 61966919  | putative protein FAM47C                                                                                                                                               | 6.74  | 115.266     | 89                      | 4                             | 6.2  | no emPAI          | 0±0                  | n/a                     |
| 38  | gi 21307630  | septin 1                                                                                                                                                              | 5.56  | 42.389      | 64                      | 2                             | 4    | no emPAI          | 0±0                  | n/a                     |
| 39  | gi 119372317 | xin actin-binding repeat-<br>containing protein 2 isoform 1                                                                                                           | 5.95  | 401.866     | 68                      | 2                             | 2.6  | no emPAI          | 0±0                  | n/a                     |
| 40  | gi 181402    | epidermal cytokeratin 2                                                                                                                                               | 8.07  | 65.825      | 336                     | 9                             | 9.1  | 0.41±0            | 4.75±4.41            | 11.51                   |
| No. | NCBI ID      | Protein                                                                                                                                                               | pI    | MW<br>(kDa) | Identification<br>score | No. of<br>matched<br>peptides | %cov | Mock<br>(Mean±SD) | Treated<br>(Mean±SD) | Ratio<br>(Treated/Mock) |
| 41  | gi 4504927   | keratin, type I cuticular Ha6                                                                                                                                         | 4.9   | 52.214      | 91                      | 4                             | 6.2  | 0.03±0.03         | 0.06±0.03            | 2.00                    |
| 42  | gi 994844    | neurofilament-66                                                                                                                                                      | 5.48  | 54.875      | 154                     | 4                             | 13   | 0.02±0.03         | 0.04±0.03            | 2.00                    |
| 43  | gi 47115317  | VIM                                                                                                                                                                   | 5.09  | 53.547      | 1677                    | 18                            | 74.5 | 4.37±3.34         | 5.76±2.37            | 1.32                    |
| 44  | gi 229597861 | Chain A, X-Ray Crystal Structure<br>Of Coil 1a Of Human Vimentin                                                                                                      | 4.35  | 4.674       | 198                     | 5                             | 76.9 | 4.1±3.72          | 5.24±2.85            | 1.28                    |
| 45  | gi 15928608  | Solute carrier family 25<br>(mitochondrial carrier; adenine                                                                                                           | 9.76  | 32.905      | 343                     | 9                             | 31.9 | 0.52±0.37         | 0.58±0.55            | 1.12                    |

|    |              |                                                                                                                                |      |         |      |    |      |           |           |      |
|----|--------------|--------------------------------------------------------------------------------------------------------------------------------|------|---------|------|----|------|-----------|-----------|------|
|    |              | nucleotide translocator), member 6                                                                                             |      |         |      |    |      |           |           |      |
|    |              | Chain E, Structure Of An Rsp5xubxsna3 Complex:                                                                                 |      |         |      |    |      |           |           |      |
| 46 | gi 530537677 | Mechanism Of Ubiquitin Ligation And Lysine Prioritization By A Hect E3                                                         | 7.06 | 9.559   | 127  | 4  | 73.5 | 0.51±0.73 | 0.43±0.35 | 0.84 |
| 47 | gi 339920    | ADP/ADT translocator protein                                                                                                   | 9.84 | 33.127  | 257  | 8  | 30   | 0.47±0    | 0.39±0.37 | 0.83 |
| 48 | gi 28336     | mutant beta-actin (beta~actin)                                                                                                 | 5.22 | 41.786  | 1041 | 17 | 57.1 | 3.31±0.67 | 2.39±0.99 | 0.72 |
| 49 | gi 62414289  | vimentin                                                                                                                       | 5.06 | 53.619  | 1880 | 18 | 74   | 4.62±4.62 | 3.08±3.08 | 0.67 |
| 50 | gi 4501887   | actin, cytoplasmic 2                                                                                                           | 5.31 | 41.766  | 1170 | 17 | 61.6 | 4.02±0.78 | 2.65±1.10 | 0.66 |
| 51 | gi 2950168   | type I keratin                                                                                                                 | 4.87 | 47.202  | 71   | 2  | 3.8  | 0.07±0    | 0.04±0.04 | 0.50 |
| 52 | gi 30311     | cytokeratin 18 (424 AA)                                                                                                        | 5.27 | 47.305  | 1072 | 17 | 56.6 | 1.9±0.40  | 0.88±0.73 | 0.46 |
| 53 | gi 1296662   | plectin                                                                                                                        | 6.77 | 238.544 | 89   | 4  | 4.4  | 0.16±0.06 | 0.07±0.05 | 0.45 |
|    |              | Chain A, Rotamer Strain As A                                                                                                   |      |         |      |    |      |           |           |      |
| 54 | gi 159162145 | Determinant Of Protein Structural Specificity                                                                                  | 6.56 | 8.56    | 95   | 3  | 61.8 | 0.6±0.27  | 0.26±0.17 | 0.42 |
| 55 | gi 11935049  | keratin 1                                                                                                                      | 8.16 | 66.027  | 353  | 9  | 23.6 | 0.26±0.37 | 0.11±0.09 | 0.40 |
| 56 | gi 179247    | ADP/ATP carrier protein                                                                                                        | 9.71 | 32.96   | 308  | 9  | 36.6 | 0.67±0    | 0.27±0.25 | 0.39 |
| 57 | gi 67782365  | keratin, type II cytoskeletal 7                                                                                                | 5.4  | 51.354  | 778  | 11 | 34.3 | 1.72±0.23 | 0.49±0.41 | 0.29 |
| 58 | gi 5031877   | lamin-B1 isoform 1                                                                                                             | 5.11 | 66.368  | 219  | 6  | 15.9 | 0.19±0.03 | 0.05±0.05 | 0.27 |
|    |              | RecName: Full=Putative beta-actin-like protein 3; AltName: Full=Kappa-actin; AltName: Full=POTE ankyrin domain family member K |      |         |      |    |      |           |           |      |
| 59 | gi 74739412  |                                                                                                                                | 5.28 | 837.787 | 128  | 3  | 3.2  | 0.35±0    | 0.08±0.08 | 0.23 |

| No. | NCBI ID      | Protein                                                   | pI   | MW (kDa) | Identification score | No. of matched peptides | %cov | Mock (Mean±SD) | Treated (Mean±SD) | Ratio (Treated/Mock) |
|-----|--------------|-----------------------------------------------------------|------|----------|----------------------|-------------------------|------|----------------|-------------------|----------------------|
| 60  | gi 31074643  | type I inner root sheath specific keratin 25 irs4         | 5.33 | 50.564   | 171                  | 4                       | 13.1 | 0.21±0         | 0.04±0.03         | 0.17                 |
| 61  | gi 32567786  | keratin, type II cytoskeletal 79                          | 6.75 | 57.8     | 229                  | 7                       | 11.6 | 0.2±0.03       | 0.03±0.03         | 0.15                 |
| 62  | gi 28173564  | keratin, type II cytoskeletal 73                          | 6.93 | 58.887   | 165                  | 4                       | 8.5  | 0.22±0.03      | 0.03±0.03         | 0.14                 |
| 63  | gi 34035     | cytokeratin 18 (232 AA)                                   | 4.92 | 26.434   | 302                  | 9                       | 39.2 | 0.71±0.1       | 0.10±0.10         | 0.13                 |
| 64  | gi 4557701   | keratin, type I cytoskeletal 17                           | 4.97 | 48.076   | 208                  | 4                       | 16.7 | 0.22±0         | 0.03±0.02         | 0.11                 |
| 65  | gi 2627129   | polyubiquitin                                             | 7.13 | 68.448   | 90                   | 4                       | 7.7  | 0.1±0          | 0.01±0            | 0.05                 |
| 66  | gi 12803709  | Keratin 14                                                | 5.09 | 51.619   | 402                  | 11                      | 23.5 | 0.45±0         | 0.01±0.02         | 0.03                 |
| 67  | gi 908803    | keratin type II                                           | 8.09 | 60.186   | 476                  | 14                      | 27   | 0.64±0.04      | 0.02±0.03         | 0.03                 |
| 68  | gi 325533397 | Chain A, Human Lamin A Coil 2b Fragment                   | 5.46 | 8.661    | 231                  | 7                       | 60.8 | 1.69±1.02      | 0.03±0.03         | 0.02                 |
| 69  | gi 4506631   | 60S ribosomal protein L30                                 | 9.65 | 12.776   | 95                   | 2                       | 36.5 | 0.44±0.17      | 0±0               | 0.00                 |
| 70  | gi 31615803  | Chain A, Synthetic Ubiquitin With Fluoro-Leu At 50 And 67 | 6.56 | 8.555    | 128                  | 3                       | 77.6 | 1.26±0.38      | 0±0.47            | 0.00                 |
| 71  | gi 5031635   | cofilin-1                                                 | 8.22 | 18.491   | 105                  | 3                       | 25.9 | 0.27±0.19      | 0±0.08            | 0.00                 |
| 72  | gi 435476    | cytokeratin 9                                             | 5.19 | 62.092   | 437                  | 11                      | 25.4 | 0.59±0         | 0±0               | 0.00                 |
| 73  | gi 30722305  | hypothetical protein                                      | 5.66 | 222.834  | 168                  | 4                       | 9.6  | 0.01±0         | 0±0               | 0.00                 |
| 74  | gi 21961605  | Keratin 10                                                | 5.09 | 58.792   | 487                  | 14                      | 33.6 | 0.69±0.09      | 0±0               | 0.00                 |
| 75  | gi 18999435  | Keratin 5                                                 | 7.59 | 62.34    | 393                  | 9                       | 19.2 | 0.38±0.03      | 0±0               | 0.00                 |
| 76  | gi 4504935   | keratin, type II cuticular Hb5 isoform 1                  | 6.28 | 55.766   | 107                  | 3                       | 13.2 | 0.03±0.03      | 0±0               | 0.00                 |
| 77  | gi 34234     | laminin-binding protein, partial                          | 4.84 | 31.774   | 292                  | 9                       | 33   | 0.28±0.21      | 0±0.10            | 0.00                 |
| 78  | gi 4505257   | moesin                                                    | 6.08 | 67.778   | 103                  | 3                       | 12   | 0.05±0         | 0±0               | 0.00                 |
| 79  | gi 35046     | NF-M                                                      | 4.9  | 102.386  | 121                  | 4                       | 6.3  | 0.02±0.02      | 0±0               | 0.00                 |
| 80  | gi 32880208  | protein diaphanous homolog 3 isoform b                    | 5.83 | 98.078   | 82                   | 3                       | 2.8  | 0.02±0.02      | 0±0               | 0.00                 |
| 81  | gi 337930    | scar protein                                              | 9.95 | 27.386   | 62                   | 2                       | 10.2 | 0.04±0.06      | 0±0               | 0.00                 |
| 82  | gi 31074641  | type I inner root sheath specific keratin 25 irs3         | 5.06 | 49.793   | 159                  | 4                       | 12   | 0.21±0         | 0±0               | 0.00                 |
| 83  | gi 1195531   | type I keratin 16                                         | 4.99 | 51.206   | 457                  | 13                      | 29.4 | 0.55±0         | 0±0               | 0.00                 |
| 84  | gi 22798968  | type II hair keratin 2                                    | 6.4  | 56.646   | 63                   | 2                       | 1.4  | 0.03±0.03      | 0±0               | 0.00                 |
| 85  | gi 5030431   | vimentin                                                  | 4.82 | 41.537   | 1292                 | 17                      | 62.1 | 5.53±1.04      | 0±0               | 0.00                 |



NCBI = National Center for Biotechnology Information. %Cov. = %Sequence coverage [(number of the matched residues/total number of residues in the entire sequence) x 100%]. DIV/0 = Divide by zero. emPAI = Exponentially modified protein abundance index. n/a = not available.
